# Supplementary material for: Emergence of non-canonical parvalbumin-containing interneurons in hippocampus of a murine model of type I lissencephaly
Source: eLife journal article supplement (doi:10.7554/elife.62373), 2020-11-05
Supplement: supp [file elife-62373-supp-v1.zip]

Archive with 22 entries (22 files):
- elife_poa_e62373_Transparent_Reporting_File.pdf
- elife_poa_e62373_Figure_2_figure_supplement_1.pdf
- elife_poa_e62373_Figure_3_figure_supplement_1.pdf
- elife_poa_e62373_Figure_4_figure_supplement_1.pdf
- elife_poa_e62373_Figure_4_figure_supplement_2.pdf
- elife_poa_e62373_Figure_4_figure_supplement_3.pdf
- elife_poa_e62373_Figure_4_figure_supplement_4.pdf
- elife_poa_e62373_Figure_5_figure_supplement_1.pdf
- elife_poa_e62373_Figure_7_figure_supplement_1.pdf
- elife_poa_e62373_Figure_7_figure_supplement_2.pdf
- elife_poa_e62373_Figure_1_source_data_1.xlsx
- elife_poa_e62373_Figure_2_source_data_1.xlsx
- elife_poa_e62373_Figure_2_figure_supplement_1_source_data_1.xlsx
- elife_poa_e62373_Figure_4_figure_supplement_3_source_data_1.xlsx
- elife_poa_e62373_Figure_5_source_data_1.xlsx
- elife_poa_e62373_Figure_5_figure_supplement_1_source_data_1.xlsx
- elife_poa_e62373_Figure_6_source_data_1.xlsx
- elife_poa_e62373_Table_1_source_data_1.xlsx
- elife_poa_e62373_Table_2_source_data_1.xlsx
- elife_poa_e62373_Supplementary_file_1.xlsx
- elife_poa_e62373_Supplementary_file_2.xlsx
- elife_poa_e62373_Supplementary_file_3.xlsx
