# Supplementary material for: Emergence of non-canonical parvalbumin-containing interneurons in hippocampus of a murine model of type I lissencephaly
Source: eLife journal article supplement (doi:10.7554/elife.62373), 2020-11-05
Supplement: supp [file elife-62373-supp-v1.zip › elife_poa_e62373_Figure_1_source_data_1.xlsx]

## Sheet: Sheet1
Fig 1C						Fig 1D
PV+INT density						PV+INT % per layer
WT	GlobalLis	NkxLis	EmxLis			WT	GlobalLis	NkxLis	EmxLis
CA1 total	CA1 total	CA1 total	CA1 total			s.o./s.p.	s.o./s.p.	s.o./s.p.	s.o./s.p.
1080.27	950.299	784.331	832.701			98.93	72.28	78.34	77.59
846.786	1094.56	633.581	1039.37			100	87.13	83.02	83.34
655.159	843.146	859.16	954.611			97.62	63.76	80.31	89.71
1041.76	678.834	823.945	1092.01			96.42	80	76.54	79
1032.2	915.212	675.6	818.124			92.63	81.67	83.55	82.44
s.o.	s.o.	s.o.	s.o.			s.r./s.l.m.	s.r./s.l.m.	s.r./s.l.m.	s.r./s.l.m.
993.239	871.678	671.609	462.135			1.08	27.72	21.67	22.41
854.571	851.201	1023.45	1002.72			0	12.87	16.98	16.67
979.36	558.356	902.296	1188.2			2.38	36.23	19.7	10.29
1178.64	489.593	812.956	469.414			3.57	20	23.46	21
1366.92	449.977	607.652	317.076			7.37	18.33	16.46	17.56
s.p.	s.p.	s.p.	s.p.
3271.41	1664.11	1912.17	1573.21
2362.78	2070.01	1175.1	2096.73
1643.33	1369.26	2340.21	1790.69
2910.25	1337.96	1945.09	2235.07
2914.21	1644.99	1921.25	1785.4
s.r./s.l.m.	s.r./s.l.m.	s.r./s.l.m.	s.r./s.l.m.
25.1651	527.028	356.526	372.109
0	324.362	208.422	348.707
48.2202	622.568	315.28	209.037
167.582	272.953	397.345	472.459
52.5028	409.046	224.811	300.118
