# Supplementary material for: Emergence of non-canonical parvalbumin-containing interneurons in hippocampus of a murine model of type I lissencephaly
Source: eLife journal article supplement (doi:10.7554/elife.62373), 2020-11-05
Supplement: supp [file elife-62373-supp-v1.zip › elife_poa_e62373_Figure_2_figure_supplement_1_source_data_1.xlsx]

## Sheet: Sheet1
Figure 2 -- Supplement 1
WT	GlobalLis
% PV-immunopositive RFP+ cells
92	97
94	92
90	89
	92
	95
	95
% RFP+ PV-immunopositive cells
98	99
97	96
95	96
	100
	98
	100
