# Supplementary material for: Emergence of non-canonical parvalbumin-containing interneurons in hippocampus of a murine model of type I lissencephaly
Source: eLife journal article supplement (doi:10.7554/elife.62373), 2020-11-05
Supplement: supp [file elife-62373-supp-v1.zip › elife_poa_e62373_Figure_2_source_data_1.xlsx]

## Sheet: Sheet1
Fig 2C
Dendrite polar histogram									Axon polar histogram								Axon Horizontal		Axon Vertical
Degree (start)	WT-1 (%)	WT-2	WT-3	WT-4	GlobalLis-1	GlobalLis-2	GlobalLis-3	GlobalLis-4	WT-1 (BiC)	WT-2 (AA)	WT-3 (BC)	WT-4 (RTC)	GlobalLis-1	GlobalLis-2	GlobalLis-3	GlobalLis-4	WT (%)	GlobalLis	WT	GlobalLis
0	1.53167	1.46359	2.10009	4.19136	0.693917	2.89819	2.72846	3.51902	5.76291	2.98177	3.64696	4.46696	2.61025	3.73148	2.72846	1.99195	53.9285	33.9037	25.1592	46.7848
10	3.16629	3.9026	1.19671	2.33315	2.02172	2.66837	2.08696	6.04081	4.47663	3.70847	3.55096	3.49369	2.24129	5.16417	2.08696	2.35677	49.4358	37.3301	29.8364	42.4987
20	2.70837	10.2981	0.460307	2.02196	2.59015	3.56348	2.00443	1.03394	4.34923	2.77286	2.17022	5.13112	2.89388	5.05245	2.00443	2.16873	50.8466	40.3329	27.6227	38.6425
30	3.62437	3.72591	1.35062	2.1508	1.69056	6.81472	2.34651	0.719125	3.66535	2.87482	3.08335	3.66617	2.71796	4.88752	2.34651	2.35698	51.3552	35.5885	29.3916	44.3314
40	4.35561	4.37795	2.56746	3.22943	3.35982	7.90478	3.18931	0	3.44438	2.70311	3.25196	3.63298	2.70783	3.23152	3.18931	1.9041
50	4.38974	4.64855	1.15463	2.32281	2.83119	7.25775	2.45095	0.0870735	2.23482	2.56596	2.88205	3.81863	3.09573	3.26968	2.45095	1.73471
60	4.28568	3.03296	1.09287	3.07522	2.95697	8.25885	3.0867	7.5808	2.17079	2.31444	1.87027	2.11689	3.40839	3.17551	3.0867	1.5466
70	5.91879	1.02145	1.6019	4.6884	4.68198	3.94312	3.48406	2.83877	1.26288	1.55849	1.86866	1.91642	3.91297	4.43501	3.48406	2.51709
80	4.48621	1.16734	0.976766	2.96522	6.48184	6.78926	3.43231	5.4453	0.936314	1.99724	1.52843	1.63959	4.23137	3.25148	3.43231	2.26482
90	2.26677	1.60952	1.88149	1.72201	6.0927	8.28965	4.02266	14.5582	1.3667	2.66775	1.21127	2.3276	3.87166	4.32768	4.02266	3.74108
100	3.40804	3.64636	3.48538	3.77281	5.30358	2.82362	3.13382	3.60185	1.58389	1.37976	1.71218	1.63579	3.05466	5.36315	3.13382	4.26334
110	1.69099	1.87448	3.32825	2.49559	4.90486	3.65137	2.98031	0	1.34672	2.11165	1.04207	2.25071	2.45154	4.60524	2.98031	4.57881
120	1.14629	1.93966	0.71901	0.841425	2.61945	0.475483	2.83608	0	0.968409	1.98227	1.3824	1.70715	2.34476	3.77846	2.83608	4.88544
130	1.32341	1.74884	1.31843	0	1.68335	1.45676	2.54732	2.72818	1.34343	2.08246	2.29704	2.06539	2.4463	3.20027	2.54732	3.87304
140	0.48672	2.55667	0.899428	0	3.08133	1.80789	3.04515	3.85632	2.3069	3.23667	3.28134	2.19748	1.94914	3.67478	3.04515	2.12679
150	0.357429	3.03045	2.34124	0	2.67723	2.27577	3.03936	8.57756	2.80091	3.64197	2.81039	3.30691	2.25219	2.6115	3.03936	1.23866
160	1.21593	5.77696	2.94527	0	2.55739	1.80512	3.756	3.62785	3.80054	3.82107	3.41422	4.72319	2.0228	1.33011	3.756	1.20008
170	0.462032	6.63502	2.66856	0	3.63647	2.8197	3.82673	4.50588	3.41407	6.25014	4.43649	4.60834	2.85428	1.60305	3.82673	3.15858
180	1.94161	8.36486	2.97096	0.0730126	3.00164	1.61085	3.50433	1.30478	4.36444	4.0788	4.83096	4.577	2.46328	2.01589	3.50433	2.89134
190	2.72489	1.91152	2.84932	1.2744	2.42395	2.39867	3.24493	4.33674	4.05638	3.05525	4.7106	2.749	2.26287	1.25134	3.24493	2.57067
200	2.97978	3.52689	3.64022	2.34604	1.49464	0.759799	3.21009	4.3079	2.46259	2.04063	3.82294	2.58452	2.02998	1.01442	3.21009	2.34742
210	4.49977	5.41372	3.6118	1.79263	3.23353	0.100022	3.56506	4.1796	2.59381	1.83613	3.93067	2.21058	1.912	0.764379	3.56506	2.99214
220	4.15128	1.53449	2.60958	0.762448	4.53937	0.405423	3.12326	0	3.20242	2.05708	3.13313	0.963017	2.23709	1.21514	3.12326	2.01075
230	5.90487	1.47155	2.62344	0.828826	4.25447	0.201544	1.88574	0	3.04331	1.66335	2.45586	1.44918	2.63212	0.949132	1.88574	2.04423
240	9.66147	0	3.40112	1.48976	3.17054	0	1.57672	0	2.97924	1.63184	2.71332	1.51673	2.73542	1.01746	1.57672	2.03706
250	6.19227	0	3.85296	3.03493	2.41875	1.374	2.78712	0	2.28399	1.62767	3.82502	1.69513	3.13556	1.10817	2.78712	3.02317
260	3.65231	0.140341	8.14142	5.65327	3.39465	1.09185	2.40717	1.43375	2.19778	1.70646	2.18827	2.24056	3.99375	2.09709	2.40717	2.20569
270	3.68997	0.632268	8.02313	3.59174	4.03732	0	2.16903	1.11536	2.01148	1.93621	1.89014	2.98667	4.26023	2.23306	2.16903	3.80997
280	2.23596	0.355434	3.12867	3.93869	2.21565	0.0756364	2.14138	0.899232	1.97881	2.84567	2.12314	2.3973	3.83434	2.32474	2.14138	2.69817
290	1.47143	0.565159	2.36953	4.83915	1.25098	0.384918	2.24814	1.48098	1.98333	2.41877	1.5508	2.2584	3.07612	2.41257	2.24814	3.04128
300	0.478407	1.51996	3.4781	9.54328	0.987649	0.368368	2.33701	7.16136	2.08889	3.65821	2.71669	2.7027	2.47405	2.36915	2.33701	3.71888
310	0.979953	4.05617	3.10374	6.24297	0.779925	1.99232	2.32566	2.49376	2.33254	2.5284	2.29975	2.3606	2.28653	2.41321	2.32566	3.01048
320	0.117059	2.51396	2.34037	5.38966	0.661078	1.49692	2.45719	2.5659	3.00451	3.89073	1.92964	2.7659	1.95674	2.21739	2.45719	3.37595
330	0.78802	0.700951	4.18136	3.2219	1.11347	1.87608	2.15411	0	3.3959	4.541	3.2891	2.69483	2.09256	2.25135	2.15411	2.67541
340	0.583478	2.73258	4.19137	7.55309	0.525356	3.67873	2.40583	0	3.54188	4.01952	3.28519	3.31022	2.75516	2.435	2.40583	4.01401
350	1.12312	2.10369	3.39451	2.61401	0.632528	6.68098	2.46009	0	5.24382	3.81336	3.86454	3.83265	2.79518	3.21747	2.46009	3.62579
