# Supplementary material for: Emergence of non-canonical parvalbumin-containing interneurons in hippocampus of a murine model of type I lissencephaly
Source: eLife journal article supplement (doi:10.7554/elife.62373), 2020-11-05
Supplement: supp [file elife-62373-supp-v1.zip › elife_poa_e62373_Figure_4_figure_supplement_3_source_data_1.xlsx]

## Sheet: Sheet1
Figure 4 -- Supplement 3B																						Figure 4 -- Supplement 3C
average # of Sholl intersections																						total sholl intersections
	WT_FS		WT_NFS		GlobalLis_FS		GlobalLis_IS		GlobalLIS_NFS		NkxLis_FS		NkxLis_IS		NkxLis_NFS		EmxLis_FS		EmxLis_NFS			WT_FS	WT_NFS	GlobalLis_FS	GlobalLis_IS	GlobalLis_NFS	NkxLis_FS	NkxLis_IS	NkxLis_NFS	EmxLis_FS	EmxLis_NFS
radius (um)	dendrite	SEM	dendrite	SEM	dendrite	SEM	dendrite	SEM	dendrite	SEM	dendrite	SEM	dendrite	SEM	dendrite	SEM	dendrite	SEM	dendrite	SEM		dendrite	dendrite	dendrite	dendrite	dendrite	dendrite	dendrite	dendrite	dendrite	dendrite
50	9.05263	0.64651	6.9	0.766667	9.16667	1.4004	7.42857	0.649437	6	1	6	1.58114	6.375	0.564975	4.33333	0.881917	6.90909	0.609837	6.25	0.946485		37	30	64	28	20	49	47	53	66	33
100	9.47368	0.962357	6.9	0.737111	10.8333	1.83333	8.42857	0.611678	8	0	6.75	1.10868	7.25	1.11403	4.66667	1.20185	8.81818	1.00741	7.25	0.75		65	56	39	32	36	24	22	15	14	17
150	8	1.09491	5	0.906765	11	1.87972	8.14286	1.24267	7	2	5	1.41421	7.5	1.476	5	1	7.63636	0.956059	6	0.707107		37	24	78	66		61	51	35	22	63
200	6.26316	1.08645	3.5	1.10805	8.83333	1.62104	6	1.6619	3.5	3.5	5.25	0.946485	6.875	1.20175	4	1.52753	6.54545	1.20124	4.75	1.25		110	24	85	18		37	105		70	38
250	4.47368	1.07434	2.7	1.18369	7.83333	1.64148	4.42857	1.64544	2	2	4.5	0.645497	7	1.67971	3	1.52753	5.54545	1.09015	3.25	1.49304		20	19	61	63			35		39
300	2.47368	0.838993	1	0.394405	6.16667	0.792324	2.71429	1.14879	1	1	4.5	1.04083	6.375	1.56909	2.33333	0.881917	5.09091	1.00412	2.5	1.32288		36	22	63	33			67		37
350	2	0.791032	0	0	5.5	1.08781	2.28571	1.04002	0.5	0.5	3.25	1.25	4.75	1.1764	1.66667	0.881917	4.72727	0.864354	1.75	1.18145		38	30		60			53		58
400	1.42105	0.542443	0	0	3.16667	0.477261	1.85714	1.20374	0	0	2.75	0.946485	3.375	0.885145	1.33333	0.666667	3.90909	0.825222	1.75	1.18145		110	24					104		79
450	0.526316	0.192982	0	0	1	0.365148	1.71429	1.10657	0	0	1.75	0.853913	3	0.823754	1.66667	0.881917	2.36364	0.560401	2	1.41421		45	19							73
500	0.263158	0.128921	0	0	0.666667	0.333333	1	0.723747	0	0	0.75	0.478714	2.75	0.881354	1.66667	0.881917	1.72727	0.428335	0.75	0.75		33	12							70
550	0.105263	0.0723352	0	0	0.5	0.341565	0.428571	0.297381	0	0	0.5	0.5	2.375	0.843833	2	1.1547	1.09091	0.546968	0.5	0.5		111								84
600	0.105263	0.105263	0	0	0.166667	0.166667	0.285714	0.184428	0	0	0.5	0.5	1.5	0.566947	1.33333	0.666667	1.18182	0.584935	0.5	0.5		37
650	0.0526316	0.0526316	0	0	0.166667	0.166667	0.142857	0.142857	0	0	0.5	0.5	0.875	0.350382	0.666667	0.333333	0.363636	0.15212	0.5	0.5		32
700	0	0	0	0	0	0	0	0	0	0	0.5	0.5	0.25	0.163663	0.666667	0.333333	0.181818	0.181818	0	0		44
750	0	0	0	0	0	0	0	0	0	0	0.25	0.25	0.25	0.25	0	0	0.0909091	0.0909091	0	0		24
																						21
																						30
																						37
																						38
radius (um)	axon	SEM	axon	SEM	axon	SEM	axon	SEM	axon	SEM	axon	SEM	axon	SEM	axon	SEM	axon	SEM	axon	SEM		axon	axon	axon	axon	axon	axon	axon	axon	axon	axon
50	8.84211	1.45751	8.7	1.83818	7.83333	1.35195	4	0.9759	2.5	1.5	7.25	2.56174	6.5	2.32993	4.33333	2.4037	7.54545	1.35085	3.5	2.17945		231	136	220	229	135	211	109	137	389	82
100	22.1579	2.30593	19.1	2.19317	19.3333	3.58391	15.5714	2.91839	4.5	3.5	23	1.47196	16.875	3.27565	8	4.72582	19.5455	2.1924	10.25	3.09233		170	129	180	131	130	326	147	89	454	60
150	31.1053	3.00477	24.8	4.08466	29.1667	7.21765	15.5714	1.5562	12.5	11.5	34.75	5.18612	25.5	3.39643	10	4.50925	32.8182	3.12415	13	2.73861		223	73	326	118		125	204	66	325	171
200	36.8421	4.02642	22.5	4.5	35.5	8.39742	25.5714	3.5312	16.5	10.5	26.5	2.87228	30.25	3.06332	8.66667	3.75648	38.2727	5.50056	15.75	2.529		124	130	458	549		161	469		536	68
250	31.6316	4.44276	17.1	3.15683	36.6667	7.54836	29	2.42015	14.5	3.5	29	6.15088	28.625	3.3961	13	2.3094	41	7.75066	17.5	4.83908		247	100	267	173			145		629
300	27.5789	3.98632	11	1.81353	33.1667	5.9689	23.2857	4.12723	15.5	1.5	24.75	6.77465	27.25	4.22471	9.66667	2.4037	42.0909	9.1358	13.75	5.10514		126	147	173	176			186		233
350	20.8421	3.79694	7.8	1.52607	27.3333	5.32082	23.4286	5.99546	13.5	0.5	21	6.20484	25.625	6.8789	8	3.05505	34.5455	8.19575	8.5	4.73462		265	71		193			288		248
400	16.7368	3.2837	4.6	1.26667	25.3333	7.82162	18.2857	7.69574	19.5	11.5	17	10.1571	18.5	8.35592	8.33333	3.71184	30.5455	7.37485	1.75	0.853913		331	197					244		107
450	10.3158	2.10409	3	1.3499	24.6667	9.10921	12.4286	6.66497	17.5	11.5	11	6.84349	12.625	6.19602	9	4.72582	21.8182	5.22201	2.5	2.17945		126	218							202
500	6.52632	1.44362	2.9	1.27758	13.3333	4.19259	15	9.65599	12.5	5.5	6.25	3.25	9	4.10139	7.33333	3.66667	17.3636	4.16538	3	3		144	112							92
550	3.36842	0.788108	1.7	1.03333	8.33333	2.29008	10.4286	6.40631	3.5	1.5	3.75	2.39357	7.75	3.56446	4.66667	2.33333	11.8182	3.0055	3.5	3.5		187								344
600	2.36842	0.757846	2	1.30809	5.33333	1.90904	9.85714	7.3239	0.5	0.5	1.25	0.946485	6.625	3.03514	3.66667	2.33333	8.09091	2.58476	2.25	2.25		284
650	1.26316	0.704381	1.4	0.991071	2	1.18322	5	3.61873	0	0	0.25	0.25	4.5	2.69258	1.33333	1.33333	4.81818	1.9717	0	0		508
700	0.894737	0.470751	1.2	1.2	1	0.816497	3.85714	3.10475	0	0	0	0	2.25	1.22109	0.666667	0.666667	2.81818	1.15064	0	0		279
750	0.631579	0.525438	1	1	0.833333	0.833333	1.71429	1.28571	0	0	0	0	1.25	0.61962	0.333333	0.333333	1.81818	0.795649	0	0		269
800	0.157895	0.115043	0.6	0.6	0.833333	0.833333	1	0.845154	0	0	0	0	0.625	0.323899	0.333333	0.333333	1.18182	0.536287	0	0		273
850	0.157895	0.115043	0.3	0.3	0	0	1.57143	1.41181	0	0	0	0	0.25	0.163663	0	0	0.818182	0.422507	0	0		131
900	0.210526	0.210526	0.6	0.6	0	0	0.285714	0.184428	0	0	0	0	0	0	0	0	0.363636	0.203279	0	0		158
950	0.157895	0.157895	0.4	0.4	0	0	0.142857	0.142857	0	0	0	0	0	0	0	0	0.0909091	0.0909091	0	0		145
1000	0.157895	0.157895	0.4	0.4	0	0	0.142857	0.142857	0	0	0	0	0	0	0	0	0.272727	0.272727	0	0
1050	0.0526316	0.0526316	0.2	0.2	0	0	0.285714	0.285714	0	0	0	0	0	0	0	0	0	0	0	0
1100	0.0526316	0.0526316	0	0	0	0	0.142857	0.142857	0	0	0	0	0	0	0	0	0	0	0	0
1150	0.0526316	0.0526316	0	0	0	0	0.142857	0.142857	0	0	0	0	0	0	0	0	0	0	0	0
1200	0.0526316	0.0526316	0	0	0	0	0	0	0	0	0	0	0	0	0	0	0	0	0	0
