# Supplementary material for: Emergence of non-canonical parvalbumin-containing interneurons in hippocampus of a murine model of type I lissencephaly
Source: eLife journal article supplement (doi:10.7554/elife.62373), 2020-11-05
Supplement: supp [file elife-62373-supp-v1.zip › elife_poa_e62373_Figure_5_figure_supplement_1_source_data_1.xlsx]

## Sheet: Sheet1
Figure 5--Supplement 1
sEPSC properties
WT_FS	WT_NFS	GlobalLis_FS	GlobalLis_IS	GlobalLis_NFS
frequency	frequency	frequency	frequency	frequency
30	12.6	12.1	5.4	1
7.2	2.7	15.9	4.7	7.1
37.8	22	42.3	5.1	2.8
36.2	1	31.9	2.7
11.1	4.8	32.4	4.5
11.2	10.5
36.2	13
37.5	3.2
30.5	1.8
20.4	5
amplitude	amplitude	amplitude	amplitude	amplitude
14.6	19.8	22	17.3	10
14.8	10.6	27.3	18.9	15.5
15.5	10.3	19.6	17.9	13
20.4	10	26.8	11
20	16.9	21	17.8
13.7	19.1
12.8	9.9
21.7	12.2
11.6	26
15.8	14.1
decay tc	decay tc	decay tc	decay tc	decay tc
2.8	2	0.93	1.4	5.9
1.7	9.6	1.2	1.6	1.5
1.8	4.4	1.3	1.7	1.6
1.2	6.7	1.4	2.8
0.7	4.1	0.9	1.1
0.8	1.7
2.1	3.8
1	4.3
1.5	2.1
1.9	2.4
