# Supplementary material for: Emergence of non-canonical parvalbumin-containing interneurons in hippocampus of a murine model of type I lissencephaly
Source: eLife journal article supplement (doi:10.7554/elife.62373), 2020-11-05
Supplement: supp [file elife-62373-supp-v1.zip › elife_poa_e62373_Figure_5_source_data_1.xlsx]

## Sheet: Sheet1
Figure 5D						Figure 5E
unitary transmission properties						unitary short-term transmission dynamics (avg)
WT_FS.BC	WT_FS.BiC	WT_NFS.BC	GlobalLis_FS	GlobalLis_IS			WT_FS.BC		WT_FS.BiC		WT_NFS.BC		GlobalLis_FS		GlobalLis_IS
Peak amp	Peak amp	Peak amp	Peak amp	Peak amp		Spike #	Peak amp	SEM	Peak amp	SEM	Peak amp	SEM	Peak amp	SEM	Peak amp	SEM
58.6617	16.6	45.1	42.7	180.646		1	170.644	74.4732	23.3286	3.65394	51.2667	16.2588	71.68	15.5856	43.2286	20.4196
277.035	30.6693	25.6	54.7	10.3		2-5	75.1926	33.6248	11.7714	1.50759	28.9556	6.95939	38.4167	11.6647	23.9667	11.8092
155.245	22.2833	76	78.1265	46.4		6-9	50.9139	25.0358	8.33571	1.55544	24.375	6.76722	26.4125	8.60777	15.4286	6.66105
27.727	16.9		138.381	26.1388		10-13	52.2944	25.8345	7.08929	0.951391	14.9667	4.56313	21.19	5.8847	13.3143	5.74798
114.242	25.9		67.7	21.4		14-17	51.7583	25.0338	7.86786	1.02245	11.925	5.2259	22.4175	6.01645	11.0714	4.60034
12.9	46.0373		177.4	26		18-21	50.0444	23.6597	8.10714	1.60187	14.65	10.9888	24.045	7.19808	13.5107	6.02602
43.5242	12.0846		21.6	11.3		22-25	47.3639	22.6489	8.05714	0.649238	10.6583	6.67084	23.01	6.60155	11.8214	5.65874
124.236			19.6
725.889			73.3				Log amp	SEM	Log amp	SEM	Log amp	SEM	Log amp	SEM	Log amp	SEM
			31.3			1	1.95416	0.177674	1.33863	0.0637959	1.66483	0.140773	1.76273	0.0963776	1.43668	0.154869
						2-5	1.58714	0.178545	1.04833	0.058435	1.43894	0.0966972	1.43293	0.118577	1.14333	0.174673
Log amp	Log amp	Log amp	Log amp	Log amp		6-9	1.41151	0.170216	0.879548	0.0762864	1.35617	0.112668	1.2473	0.127504	1.01717	0.147089
1.76835	1.22011	1.65418	1.63043	2.25683		10-13	1.42636	0.171407	0.833022	0.046884	1.13805	0.123503	1.19382	0.112137	0.954179	0.142159
2.44253	1.4867	1.40824	1.73799	1.01284		14-17	1.41311	0.178069	0.870047	0.0636682	0.998776	0.178234	1.22798	0.108042	0.886438	0.13909
2.19102	1.34798	1.88081	1.8928	1.66652		18-21	1.4152	0.169518	0.850558	0.0965236	0.896216	0.334363	1.2276	0.121167	0.928274	0.163463
1.4429	1.22789		2.14108	1.41729		22-25	1.39128	0.16908	0.897506	0.0357498	0.860536	0.259839	1.21657	0.118013	0.849653	0.169132
2.05783	1.4133		1.83059	1.33041
1.11059	1.66311		2.24895	1.41497			Failure rate	SEM	Failure rate	SEM	Failure rate	SEM	Failure rate	SEM	Failure rate	SEM
1.63873	1.08223		1.33445	1.05308		1	0.0111111	0.0111111	0.114286	0.0459221	0.166667	0.120185	0.01	0.01	0.142857	0.0528121
2.09425			1.29226			2-5	0.155556	0.0732828	0.347619	0.0538748	0.288889	0.0867806	0.146667	0.0382326	0.447619	0.0994315
2.86087			1.8651			6-9	0.230556	0.069194	0.507143	0.0647142	0.383333	0.0416667	0.2975	0.0634046	0.514286	0.0891189
			1.49554			10-13	0.244444	0.0762372	0.628571	0.044128	0.491667	0.122758	0.3275	0.0625222	0.596429	0.0724628
						14-17	0.269444	0.0748584	0.592857	0.0496159	0.641667	0.0982486	0.31	0.0619363	0.6	0.0803638
Potency	Potency	Potency	Potency	Potency		18-21	0.291667	0.0897527	0.607143	0.0682943	0.716667	0.183333	0.31	0.0612599	0.607143	0.0875789
58.6617	16.6	49.3	78.1265	180.646		22-25	0.288889	0.0791788	0.575	0.0419041	0.725	0.16266	0.3175	0.0657278	0.621429	0.105564
277.035	37.2264	42.2	138.381	35.4302
155.245	24.3921	76	67.7	21.4
27.727	19.1964		177.4	45.0012
114.242	25.9		42.7	11.3
14.7	46.0373		54.7
43.5242	14.4		25.6	14.7
124.236			22.4	59.4
725.889			73.3
			31.3
Decay tau	Decay tau	Decay tau	Decay tau	Decay tau
6.15623	4.22648	4.79905	8.82005	6.20421
8.45064	9.76175	5.08691	11.5631	13.2921
9.03505	9.03371	6.23829	4.92	8.8134
4.96346	8.05128		5.52233	6.34238
7.23561	5.00141		8.02376	10.6995
7.33575	7.53709		5.07015	5.88008
5.30077	5.11825		6.75182	4.32975
4.32122			3.56829
6.43906			6.51194
			5.79608
Latency	Latency	Latency	Latency	Latency
1.27	0.79	2.56	0.7	1.92
1.2	0.88	2.73	1.18	2.11
1.68	1.02	1.9	0.57	1.19
1.99	1.23		1.13	1.68
1.01	1.53		0.96	1.83
0.97	1.06		0.55	2.04
1.15	1.45		0.92	1.12
0.99			0.9
0.63			1.03
			0.8
Transmision prob	Transmision prob	Transmision prob	Transmision prob	Transmision prob
1	1	0.9	1	1
1	0.8	0.6	1	0.6
1	0.9	1	1	0.8
1	0.7		1	0.7
1	1		1	1
0.9	1		1	0.7
1	0.8		0.9	1
1			0.8
1			1
			1
