# Supplementary material for: Emergence of non-canonical parvalbumin-containing interneurons in hippocampus of a murine model of type I lissencephaly
Source: eLife journal article supplement (doi:10.7554/elife.62373), 2020-11-05
Supplement: supp [file elife-62373-supp-v1.zip › elife_poa_e62373_Figure_6_source_data_1.xlsx]

## Sheet: Sheet1
Figure 6B
Current inducing depolarization block
WT_FS	WT_NFS	GlobalLis_FS	GlobalLis_IS	GlobalLis_NFS
1350	850	950	1450	350
1350	900	1350	800	350
700	450	1450	550	1050
1500	550	1350	1250	1050
			1150
			900
			1200
			1150
			900
			750
			750
