# Supplementary material for: Emergence of non-canonical parvalbumin-containing interneurons in hippocampus of a murine model of type I lissencephaly
Source: eLife journal article supplement (doi:10.7554/elife.62373), 2020-11-05
Supplement: supp [file elife-62373-supp-v1.zip › elife_poa_e62373_Supplementary_file_3.xlsx]

## Sheet: Supplemental Table3
Symbol1	Symbol2	Species	UniProt1	UniProt2	Evidence type
Dab1	Pafah1b1	Human	O75553	P43034	exp;pred
Dcc	Pafah1b1	Human	P43146	P43034	pred
Egfr	Pafah1b1	Human	P00533	P43034	pred
Gas7	Pafah1b1	Human	O60861	P43034	pred
Myo1e	Pafah1b1	Human	Q12965	P43034	exp
Prkcg	Pafah1b1	Human	P05129	P43034	pred
Slit1	Pafah1b1	Human	O75093	P43034	pred
Slit3	Pafah1b1	Human	O75094	P43034	pred
Arhgap1	Pafah1b1	Mouse	Q5FWK3	P63005	exp
Cdc42	Pafah1b1	Mouse	P60766	P63005	exp
Clip1	Pafah1b1	Mouse	Q922J3	P63005	exp;ortho
Iqgap1	Pafah1b1	Mouse	Q9JKF1	P63005	exp
Lnx1	Pafah1b1	Mouse	O70263	P63005	exp
Ywhae	Pafah1b1	Mouse	P62259	P63005	exp
2020-09-03	Pafah1b1	Human	Q9UH03	P43034	pred
Aaas	Pafah1b1	Human	Q9NRG9	P43034	pred
Abi2	Pafah1b1	Human	Q9NYB9	P43034	pred
Acta1	Pafah1b1	Human	P68133	P43034	pred
Actc1	Pafah1b1	Human	P68032	P43034	pred
Actr1a	Pafah1b1	Human	P61163	P43034	pred
Adad1	Pafah1b1	Human	Q96M93	P43034	pred
Agap3	Pafah1b1	Human	Q96P47	P43034	pred
Ahi1	Pafah1b1	Human	Q8N157	P43034	exp
Akap9	Pafah1b1	Human	Q99996	P43034	pred
Amph	Pafah1b1	Human	P49418	P43034	pred
Ap1g1	Pafah1b1	Human	O43747	P43034	exp
Apba1	Pafah1b1	Human	Q02410	P43034	pred
Apbb1	Pafah1b1	Human	O00213	P43034	pred
App	Pafah1b1	Human	P05067	P43034	pred
Appl1	Pafah1b1	Human	Q9UKG1	P43034	pred
Arf1	Pafah1b1	Human	P84077	P43034	pred
Arhgef11	Pafah1b1	Human	O15085	P43034	pred
Arhgef7	Pafah1b1	Human	Q14155	P43034	pred
Arhgef9	Pafah1b1	Human	O43307	P43034	pred
Arl1	Pafah1b1	Human	P40616	P43034	pred
Arl3	Pafah1b1	Human	P36405	P43034	pred
Arl6	Pafah1b1	Human	Q9H0F7	P43034	pred
Arl8a	Pafah1b1	Human	Q96BM9	P43034	pred
Arl8b	Pafah1b1	Human	Q9NVJ2	P43034	pred
Arpc4	Pafah1b1	Human	P59998	P43034	pred
Arpc5	Pafah1b1	Human	O15511	P43034	pred
Arpc5l	Pafah1b1	Human	Q9BPX5	P43034	pred
Arx	Pafah1b1	Human	Q96QS3	P43034	pred
Asns	Pafah1b1	Human	P08243	P43034	exp
Atic	Pafah1b1	Human	P31939	P43034	exp
Atp6v1c1	Pafah1b1	Human	P21283	P43034	pred
Aurka	Pafah1b1	Human	O14965	P43034	pred
Axin2	Pafah1b1	Human	Q9Y2T1	P43034	pred
Bbs2	Pafah1b1	Human	Q9BXC9	P43034	pred
Bbs4	Pafah1b1	Human	Q96RK4	P43034	pred
Bicd2	Pafah1b1	Human	Q8TD16	P43034	exp;pred
Brsk1	Pafah1b1	Human	Q8TDC3	P43034	pred
Btrc	Pafah1b1	Human	Q9Y297	P43034	pred
Bub3	Pafah1b1	Human	O43684	P43034	pred
Cacnb4	Pafah1b1	Human	O00305	P43034	pred
Camsap3	Pafah1b1	Human	Q9P1Y5	P43034	pred
Capn2	Pafah1b1	Human	P17655	P43034	exp
Capns1	Pafah1b1	Human	P04632	P43034	exp
Ccdc88a	Pafah1b1	Human	Q3V6T2	P43034	pred
Ccl4	Pafah1b1	Human	P13236	P43034	pred
Ccser2	Pafah1b1	Human	Q9H7U1	P43034	pred
Cdc20	Pafah1b1	Human	Q12834	P43034	pred
Cdc40	Pafah1b1	Human	O60508	P43034	pred
Cdc5l	Pafah1b1	Human	Q99459	P43034	pred
Cdk2	Pafah1b1	Human	P24941	P43034	exp
Cdk5	Pafah1b1	Human	Q00535	P43034	pred
Cenpe	Pafah1b1	Human	Q02224	P43034	pred
Cenpf	Pafah1b1	Human	P49454	P43034	exp;ortho;pred
Cep128	Pafah1b1	Human	Q6ZU80	P43034	exp
Cep135	Pafah1b1	Human	Q66GS9	P43034	exp
Cep170	Pafah1b1	Human	Q5SW79	P43034	pred
Cep250	Pafah1b1	Human	Q9BV73	P43034	pred
Cetn2	Pafah1b1	Human	P41208	P43034	pred
Chfr	Pafah1b1	Human	Q96EP1	P43034	pred
Chid1	Pafah1b1	Human	Q9BWS9	P43034	exp
Chmp2b	Pafah1b1	Human	Q9UQN3	P43034	exp
Clip2	Pafah1b1	Human	Q9UDT6	P43034	pred
Clu	Pafah1b1	Human	P10909	P43034	pred
Cntnap2	Pafah1b1	Human	Q9UHC6	P43034	pred
Cntrl	Pafah1b1	Human	Q7Z7A1	P43034	pred
Copa	Pafah1b1	Human	P53621	P43034	pred
Copb2	Pafah1b1	Human	P35606	P43034	pred
Cops5	Pafah1b1	Human	Q92905	P43034	ortho
Crk	Pafah1b1	Human	P46108	P43034	pred
Csnk2a1	Pafah1b1	Human	P68400	P43034	exp;pred
Csnk2a2	Pafah1b1	Human	P19784	P43034	pred
Cstf1	Pafah1b1	Human	Q05048	P43034	exp
Ctbp1	Pafah1b1	Human	Q13363	P43034	pred
Ctnna2	Pafah1b1	Human	P26232	P43034	pred
Ctnnb1	Pafah1b1	Human	P35222	P43034	pred
Cyld	Pafah1b1	Human	Q9NQC7	P43034	pred
Daw1	Pafah1b1	Human	Q8N136	P43034	pred
Dcaf11	Pafah1b1	Human	Q8TEB1	P43034	pred
Dcaf12l2	Pafah1b1	Human	Q5VW00	P43034	pred
Dcdc5	Pafah1b1	Human	Q6ZRR9	P43034	exp
Dclk1	Pafah1b1	Human	O15075	P43034	pred
Dctn1	Pafah1b1	Human	Q14203	P43034	exp;pred
Dctn2	Pafah1b1	Human	Q13561	P43034	exp;ortho;pred
Dctn3	Pafah1b1	Human	O75935	P43034	pred
Dcx	Pafah1b1	Human	O43602	P43034	exp;pred
Disc1	Pafah1b1	Human	Q9NRI5	P43034	exp;pred
Dixdc1	Pafah1b1	Human	Q155Q3	P43034	pred
Dlx1	Pafah1b1	Human	P56177	P43034	pred
Dlx2	Pafah1b1	Human	Q07687	P43034	pred
Dnah8	Pafah1b1	Human	Q96JB1	P43034	pred
Dnai1	Pafah1b1	Human	Q9UI46	P43034	exp
Dnm3	Pafah1b1	Human	Q9UQ16	P43034	pred
Drd1	Pafah1b1	Human	P21728	P43034	pred
Dync1h1	Pafah1b1	Human	Q14204	P43034	exp;ortho;pred
Dync1i1	Pafah1b1	Human	O14576	P43034	exp;pred
Dync1i2	Pafah1b1	Human	Q13409	P43034	exp
Dync1li1	Pafah1b1	Human	Q9Y6G9	P43034	exp
Dync2h1	Pafah1b1	Human	Q8NCM8	P43034	pred
Dynll1	Pafah1b1	Human	P63167	P43034	exp
Dynlrb1	Pafah1b1	Human	Q9NP97	P43034	pred
Dynlrb2	Pafah1b1	Human	Q8TF09	P43034	exp
Dynlt1	Pafah1b1	Human	P63172	P43034	exp
Dynlt3	Pafah1b1	Human	P51808	P43034	exp
Ect2	Pafah1b1	Human	Q9H8V3	P43034	pred
Eif5	Pafah1b1	Human	P55010	P43034	exp
Eif5a2	Pafah1b1	Human	Q9GZV4	P43034	pred
Elp1	Pafah1b1	Human	O95163	P43034	pred
Emx2	Pafah1b1	Human	Q04743	P43034	pred
Ep300	Pafah1b1	Human	Q09472	P43034	pred
Ephb1	Pafah1b1	Human	P54762	P43034	pred
Ercc8	Pafah1b1	Human	Q13216	P43034	pred
Etnk1	Pafah1b1	Human	Q9HBU6	P43034	pred
Fabp3	Pafah1b1	Human	P05413	P43034	pred
Fabp9	Pafah1b1	Human	Q0Z7S8	P43034	pred
Fbxw11	Pafah1b1	Human	Q9UKB1	P43034	pred
Fermt1	Pafah1b1	Human	Q9BQL6	P43034	pred
Fgd4	Pafah1b1	Human	Q96M96	P43034	pred
Fgd6	Pafah1b1	Human	Q6ZV73	P43034	pred
Fgfbp1	Pafah1b1	Human	Q14512	P43034	pred
Fgfr1op	Pafah1b1	Human	O95684	P43034	pred
Fh	Pafah1b1	Human	P07954	P43034	exp
Frs2	Pafah1b1	Human	Q8WU20	P43034	pred
Ftcd	Pafah1b1	Human	O95954	P43034	pred
Fzr1	Pafah1b1	Human	Q9UM11	P43034	pred
G3bp2	Pafah1b1	Human	Q9UN86	P43034	pred
Gadd45a	Pafah1b1	Human	P24522	P43034	pred
Gid8	Pafah1b1	Human	Q9NWU2	P43034	exp;pred
Gna11	Pafah1b1	Human	P29992	P43034	pred
Gna12	Pafah1b1	Human	Q03113	P43034	pred
Gna13	Pafah1b1	Human	Q14344	P43034	pred
Gna15	Pafah1b1	Human	P30679	P43034	pred
Gnai1	Pafah1b1	Human	P63096	P43034	pred
Gnai2	Pafah1b1	Human	P04899	P43034	pred
Gnai3	Pafah1b1	Human	P08754	P43034	pred
Gnal	Pafah1b1	Human	P38405	P43034	pred
Gnao1	Pafah1b1	Human	P09471	P43034	pred
Gnaq	Pafah1b1	Human	P50148	P43034	pred
Gnas	Pafah1b1	Human	Q5JWF2	P43034	pred
Gnat1	Pafah1b1	Human	P11488	P43034	pred
Gnat2	Pafah1b1	Human	P19087	P43034	pred
Gnat3	Pafah1b1	Human	A8MTJ3	P43034	pred
Gnaz	Pafah1b1	Human	P19086	P43034	pred
Gnb1	Pafah1b1	Human	P62873	P43034	pred
Gnb1l	Pafah1b1	Human	Q9BYB4	P43034	pred
Gnb5	Pafah1b1	Human	O14775	P43034	pred
Gng2	Pafah1b1	Human	P59768	P43034	pred
Gngt1	Pafah1b1	Human	P63211	P43034	pred
Golph3	Pafah1b1	Human	Q9H4A6	P43034	pred
Gpsm2	Pafah1b1	Human	P81274	P43034	pred
Grk2	Pafah1b1	Human	P25098	P43034	pred
Gsx2	Pafah1b1	Human	Q9BZM3	P43034	pred
Hdac6	Pafah1b1	Human	Q9UBN7	P43034	pred
Hipk2	Pafah1b1	Human	Q9H2X6	P43034	pred
Hmgb3	Pafah1b1	Human	O15347	P43034	exp
Hmx3	Pafah1b1	Human	A6NHT5	P43034	pred
Hoxb4	Pafah1b1	Human	P17483	P43034	pred
Hoxb8	Pafah1b1	Human	P17481	P43034	pred
Hoxc10	Pafah1b1	Human	Q9NYD6	P43034	pred
Hras	Pafah1b1	Human	P01112	P43034	pred
Hsp90aa1	Pafah1b1	Human	P07900	P43034	exp;pred
Hsp90aa4p	Pafah1b1	Human	Q58FG1	P43034	exp
Hsp90ab1	Pafah1b1	Human	P08238	P43034	exp
Hspa8	Pafah1b1	Human	P11142	P43034	exp
Hsph1	Pafah1b1	Human	Q92598	P43034	exp
Ift172	Pafah1b1	Human	Q9UG01	P43034	pred
Igf1r	Pafah1b1	Human	P08069	P43034	pred
Ikbkg	Pafah1b1	Human	Q9Y6K9	P43034	pred
Ints13	Pafah1b1	Human	Q9NVM9	P43034	ortho
Iqcb1	Pafah1b1	Human	Q15051	P43034	exp
Isg15	Pafah1b1	Human	P05161	P43034	exp
Isoc1	Pafah1b1	Human	Q96CN7	P43034	exp
Itga8	Pafah1b1	Human	P53708	P43034	pred
Itgb3	Pafah1b1	Human	P05106	P43034	pred
Kalrn	Pafah1b1	Human	O60229	P43034	pred
Kars	Pafah1b1	Human	Q15046	P43034	exp
Katna1	Pafah1b1	Human	O75449	P43034	exp
Katnb1	Pafah1b1	Human	Q9BVA0	P43034	exp;pred
Kcnma1	Pafah1b1	Human	Q12791	P43034	pred
Kif11	Pafah1b1	Human	P52732	P43034	pred
Kif18a	Pafah1b1	Human	Q8NI77	P43034	pred
Kif1a	Pafah1b1	Human	Q12756	P43034	pred
Kif21a	Pafah1b1	Human	Q7Z4S6	P43034	pred
Kif21b	Pafah1b1	Human	O75037	P43034	pred
Kif22	Pafah1b1	Human	Q14807	P43034	pred
Kif23	Pafah1b1	Human	Q02241	P43034	pred
Kif2a	Pafah1b1	Human	O00139	P43034	pred
Kif2c	Pafah1b1	Human	Q99661	P43034	pred
Kif3a	Pafah1b1	Human	Q9Y496	P43034	pred
Kif3b	Pafah1b1	Human	O15066	P43034	pred
Kif3c	Pafah1b1	Human	O14782	P43034	pred
Kifap3	Pafah1b1	Human	Q92845	P43034	pred
Kifc1	Pafah1b1	Human	Q9BW19	P43034	pred
Kit	Pafah1b1	Human	P10721	P43034	pred
Klc2	Pafah1b1	Human	Q9H0B6	P43034	pred
Klhdc3	Pafah1b1	Human	Q9BQ90	P43034	pred
Klhl1	Pafah1b1	Human	Q9NR64	P43034	pred
Kras	Pafah1b1	Human	P01116	P43034	pred
Llgl1	Pafah1b1	Human	Q15334	P43034	pred
Llgl2	Pafah1b1	Human	Q6P1M3	P43034	pred
Lrp8	Pafah1b1	Human	Q14114	P43034	pred
Lyst	Pafah1b1	Human	Q99698	P43034	pred
Macf1	Pafah1b1	Human	Q9UPN3	P43034	pred
Map1b	Pafah1b1	Human	P46821	P43034	exp;ortho;pred
Map2k1	Pafah1b1	Human	Q02750	P43034	pred
Map2k6	Pafah1b1	Human	P52564	P43034	pred
Map3k3	Pafah1b1	Human	Q99759	P43034	pred
Mapk8ip2	Pafah1b1	Human	Q13387	P43034	pred
Mapre1	Pafah1b1	Human	Q15691	P43034	exp
Mapre2	Pafah1b1	Human	Q15555	P43034	exp;pred
Mapt	Pafah1b1	Human	P10636	P43034	pred
Mark2	Pafah1b1	Human	Q7KZI7	P43034	pred
Matr3	Pafah1b1	Human	P43243	P43034	pred
Mcf2	Pafah1b1	Human	P10911	P43034	pred
Mcf2l2	Pafah1b1	Human	Q86YR7	P43034	pred
Mcph1	Pafah1b1	Human	Q8NEM0	P43034	pred
Mfn2	Pafah1b1	Human	O95140	P43034	pred
Mkln1	Pafah1b1	Human	Q9UL63	P43034	pred
Mllt10	Pafah1b1	Human	P55197	P43034	pred
Mlst8	Pafah1b1	Human	Q9BVC4	P43034	pred
Mras	Pafah1b1	Human	O14807	P43034	pred
Msn	Pafah1b1	Human	P26038	P43034	exp
Mtor	Pafah1b1	Human	P42345	P43034	pred
Mycbp2	Pafah1b1	Human	O75592	P43034	pred
Myo10	Pafah1b1	Human	Q9HD67	P43034	pred
Myo5a	Pafah1b1	Human	Q9Y4I1	P43034	pred
Nbea	Pafah1b1	Human	Q8NFP9	P43034	pred
Ndc80	Pafah1b1	Human	O14777	P43034	pred
Nde1	Pafah1b1	Human	Q9NXR1	P43034	exp;ortho;pred
Ndel1	Pafah1b1	Human	Q9GZM8	P43034	exp;ortho;pred
Nefl	Pafah1b1	Human	P07196	P43034	pred
Neurl1	Pafah1b1	Human	O76050	P43034	pred
Ngef	Pafah1b1	Human	Q8N5V2	P43034	pred
Nkx2-1	Pafah1b1	Human	P43699	P43034	pred
Nkx2-5	Pafah1b1	Human	P52952	P43034	pred
Nle1	Pafah1b1	Human	Q9NVX2	P43034	pred
Nras	Pafah1b1	Human	P01111	P43034	pred
Nsmaf	Pafah1b1	Human	Q92636	P43034	pred
Ntrk1	Pafah1b1	Human	P04629	P43034	exp
Nudc	Pafah1b1	Human	Q9Y266	P43034	exp;pred
Nudcd2	Pafah1b1	Human	Q8WVJ2	P43034	exp
Nudcd3	Pafah1b1	Human	Q8IVD9	P43034	exp;pred
Numb	Pafah1b1	Human	P49757	P43034	pred
Nup133	Pafah1b1	Human	Q8WUM0	P43034	pred
Nup37	Pafah1b1	Human	Q8NFH4	P43034	pred
Nup43	Pafah1b1	Human	Q8NFH3	P43034	pred
Obscn	Pafah1b1	Human	Q5VST9	P43034	pred
Ofd1	Pafah1b1	Human	O75665	P43034	pred
Opa1	Pafah1b1	Human	O60313	P43034	pred
Otp	Pafah1b1	Human	Q5XKR4	P43034	pred
Pafah1b1	Pafah1b1	Human	P43034	P43034	exp;ortho;pred
Pafah1b2	Pafah1b1	Human	P68402	P43034	exp;pred
Pafah1b3	Pafah1b1	Human	Q15102	P43034	exp;ortho;pred
Pak2	Pafah1b1	Human	Q13177	P43034	exp
Papss1	Pafah1b1	Human	O43252	P43034	exp
Pard3	Pafah1b1	Human	Q8TEW0	P43034	pred
Pclaf	Pafah1b1	Human	Q15004	P43034	pred
Pcm1	Pafah1b1	Human	Q15154	P43034	pred
Pdc	Pafah1b1	Human	P20941	P43034	pred
Pde4b	Pafah1b1	Human	Q07343	P43034	exp
Pde4d	Pafah1b1	Human	Q08499	P43034	exp
Pdia4	Pafah1b1	Human	P13667	P43034	exp
Pea15	Pafah1b1	Human	Q15121	P43034	pred
Pex7	Pafah1b1	Human	O00628	P43034	pred
Phgdh	Pafah1b1	Human	O43175	P43034	ortho
Pik3r1	Pafah1b1	Human	P27986	P43034	pred
Pitpna	Pafah1b1	Human	Q00169	P43034	pred
Pla2g1b	Pafah1b1	Human	P04054	P43034	pred
Pla2g2d	Pafah1b1	Human	Q9UNK4	P43034	pred
Pla2g2e	Pafah1b1	Human	Q9NZK7	P43034	pred
Pla2g2f	Pafah1b1	Human	Q9BZM2	P43034	pred
Pla2g7	Pafah1b1	Human	Q13093	P43034	pred
Plaa	Pafah1b1	Human	Q9Y263	P43034	pred
Plcb1	Pafah1b1	Human	Q9NQ66	P43034	pred
Plekha1	Pafah1b1	Human	Q9HB21	P43034	pred
Plk1	Pafah1b1	Human	P53350	P43034	pred
Plk2	Pafah1b1	Human	Q9NYY3	P43034	pred
Plxna2	Pafah1b1	Human	O75051	P43034	pred
Plxna3	Pafah1b1	Human	P51805	P43034	pred
Poc1b	Pafah1b1	Human	Q8TC44	P43034	pred
Pon1	Pafah1b1	Human	P27169	P43034	pred
Pou3f2	Pafah1b1	Human	P20265	P43034	pred
Pou3f3	Pafah1b1	Human	P20264	P43034	pred
Pou3f4	Pafah1b1	Human	P49335	P43034	pred
Pou4f3	Pafah1b1	Human	Q15319	P43034	pred
Ppm1e	Pafah1b1	Human	Q8WY54	P43034	pred
Ppp1r9b	Pafah1b1	Human	Q96SB3	P43034	pred
Ppp2ca	Pafah1b1	Human	P67775	P43034	pred
Ppp2r1a	Pafah1b1	Human	P30153	P43034	pred
Ppp3ca	Pafah1b1	Human	Q08209	P43034	pred
Prepl	Pafah1b1	Human	Q4J6C6	P43034	pred
Prickle2	Pafah1b1	Human	Q7Z3G6	P43034	pred
Prkaca	Pafah1b1	Human	P17612	P43034	pred
Prkar2b	Pafah1b1	Human	P31323	P43034	pred
Prkci	Pafah1b1	Human	P41743	P43034	pred
Prkcz	Pafah1b1	Human	Q05513	P43034	pred
Prkn	Pafah1b1	Human	O60260	P43034	pred
Prop1	Pafah1b1	Human	O75360	P43034	pred
Prpf19	Pafah1b1	Human	Q9UMS4	P43034	pred
Psd3	Pafah1b1	Human	Q9NYI0	P43034	pred
Psme1	Pafah1b1	Human	Q06323	P43034	pred
Ptk2	Pafah1b1	Human	Q05397	P43034	pred
Ptk2b	Pafah1b1	Human	Q14289	P43034	pred
Pxn	Pafah1b1	Human	P49023	P43034	pred
Rab11a	Pafah1b1	Human	P62491	P43034	pred
Rab25	Pafah1b1	Human	P57735	P43034	pred
Rab27a	Pafah1b1	Human	P51159	P43034	pred
Rab2a	Pafah1b1	Human	P61019	P43034	pred
Rab3a	Pafah1b1	Human	P20336	P43034	pred
Rab4a	Pafah1b1	Human	P20338	P43034	pred
Rab5c	Pafah1b1	Human	P51148	P43034	pred
Rab6a	Pafah1b1	Human	P20340	P43034	pred
Rab6b	Pafah1b1	Human	Q9NRW1	P43034	pred
Rab7a	Pafah1b1	Human	P51149	P43034	pred
Rab9b	Pafah1b1	Human	Q9NP90	P43034	pred
Rabgap1	Pafah1b1	Human	Q9Y3P9	P43034	pred
Rac1	Pafah1b1	Human	P63000	P43034	pred
Rac3	Pafah1b1	Human	P60763	P43034	pred
Rack1	Pafah1b1	Human	P63244	P43034	pred
Rad21	Pafah1b1	Human	O60216	P43034	pred
Ralb	Pafah1b1	Human	P11234	P43034	pred
Ranbp9	Pafah1b1	Human	Q96S59	P43034	pred
Rasa1	Pafah1b1	Human	P20936	P43034	pred
Rasd2	Pafah1b1	Human	Q96D21	P43034	pred
Rax	Pafah1b1	Human	Q9Y2V3	P43034	pred
Reln	Pafah1b1	Human	P78509	P43034	pred
Rgs16	Pafah1b1	Human	O15492	P43034	pred
Rgs4	Pafah1b1	Human	P49798	P43034	pred
Rgs9	Pafah1b1	Human	O75916	P43034	pred
Rhof	Pafah1b1	Human	Q9HBH0	P43034	pred
Rhot1	Pafah1b1	Human	Q8IXI2	P43034	pred
Rhot2	Pafah1b1	Human	Q8IXI1	P43034	pred
Rhou	Pafah1b1	Human	Q7L0Q8	P43034	pred
Rit2	Pafah1b1	Human	Q99578	P43034	pred
Rnd1	Pafah1b1	Human	Q92730	P43034	pred
Rock2	Pafah1b1	Human	O75116	P43034	pred
Sar1b	Pafah1b1	Human	Q9Y6B6	P43034	pred
Sbds	Pafah1b1	Human	Q9Y3A5	P43034	exp
Sbf2	Pafah1b1	Human	Q86WG5	P43034	pred
Scly	Pafah1b1	Human	Q96I15	P43034	exp
Sec13	Pafah1b1	Human	P55735	P43034	pred
Seh1l	Pafah1b1	Human	Q96EE3	P43034	pred
Sema4f	Pafah1b1	Human	O95754	P43034	pred
Shc3	Pafah1b1	Human	Q92529	P43034	pred
Slc2a4	Pafah1b1	Human	P14672	P43034	ortho;pred
Slit2	Pafah1b1	Human	O94813	P43034	pred
Snrpd2	Pafah1b1	Human	P62316	P43034	exp
Snrpf	Pafah1b1	Human	P62306	P43034	exp
Snx6	Pafah1b1	Human	Q9UNH7	P43034	pred
Spag16	Pafah1b1	Human	Q8N0X2	P43034	pred
Sptb	Pafah1b1	Human	P11277	P43034	pred
Sptbn1	Pafah1b1	Human	Q01082	P43034	pred
Sptbn2	Pafah1b1	Human	O15020	P43034	pred
Sptbn4	Pafah1b1	Human	Q9H254	P43034	pred
Sptbn5	Pafah1b1	Human	Q9NRC6	P43034	pred
Stard13	Pafah1b1	Human	Q9Y3M8	P43034	pred
Stk38	Pafah1b1	Human	Q15208	P43034	pred
Stk38l	Pafah1b1	Human	Q9Y2H1	P43034	pred
Stmn3	Pafah1b1	Human	Q9NZ72	P43034	pred
Strap	Pafah1b1	Human	Q9Y3F4	P43034	pred
Strbp	Pafah1b1	Human	Q96SI9	P43034	pred
Strn	Pafah1b1	Human	O43815	P43034	pred
Tacc3	Pafah1b1	Human	Q9Y6A5	P43034	pred
Tatdn1	Pafah1b1	Human	Q6P1N9	P43034	exp
Tbl1x	Pafah1b1	Human	O60907	P43034	pred
Tbpl1	Pafah1b1	Human	P62380	P43034	pred
Tctex1d2	Pafah1b1	Human	Q8WW35	P43034	exp
Thoc3	Pafah1b1	Human	Q96J01	P43034	pred
Thoc6	Pafah1b1	Human	Q86W42	P43034	pred
Tiam1	Pafah1b1	Human	Q13009	P43034	pred
Tle1	Pafah1b1	Human	Q04724	P43034	pred
Tle2	Pafah1b1	Human	Q04725	P43034	pred
Tle3	Pafah1b1	Human	Q04726	P43034	pred
Tnik	Pafah1b1	Human	Q9UKE5	P43034	exp
Trim25	Pafah1b1	Human	Q14258	P43034	exp
Ttn	Pafah1b1	Human	Q8WZ42	P43034	pred
Tuba1a	Pafah1b1	Human	Q71U36	P43034	exp;pred
Tuba4a	Pafah1b1	Human	P68366	P43034	pred
Txndc8	Pafah1b1	Human	Q6A555	P43034	pred
Ubxn1	Pafah1b1	Human	Q04323	P43034	exp
Vax1	Pafah1b1	Human	Q5SQQ9	P43034	pred
Wdr17	Pafah1b1	Human	Q8IZU2	P43034	pred
Wdr33	Pafah1b1	Human	Q9C0J8	P43034	pred
Wdr44	Pafah1b1	Human	Q5JSH3	P43034	pred
Wdr48	Pafah1b1	Human	Q8TAF3	P43034	pred
Wdr5	Pafah1b1	Human	P61964	P43034	exp;pred
Wdr5b	Pafah1b1	Human	Q86VZ2	P43034	pred
Wdr77	Pafah1b1	Human	Q9BQA1	P43034	pred
Wdr82	Pafah1b1	Human	Q6UXN9	P43034	pred
Wdr89	Pafah1b1	Human	Q96FK6	P43034	pred
Wipi1	Pafah1b1	Human	Q5MNZ9	P43034	pred
Wipi2	Pafah1b1	Human	Q9Y4P8	P43034	pred
Wsb2	Pafah1b1	Human	Q9NYS7	P43034	pred
Ywhag	Pafah1b1	Human	P61981	P43034	exp
Ywhah	Pafah1b1	Human	Q04917	P43034	exp
Znf197	Pafah1b1	Human	O14709	P43034	pred
Znf91	Pafah1b1	Human	Q05481	P43034	pred
