# Supplementary material for: Emergence of non-canonical parvalbumin-containing interneurons in hippocampus of a murine model of type I lissencephaly
Source: eLife journal article supplement (doi:10.7554/elife.62373), 2020-11-05
Supplement: supp [file elife-62373-supp-v1.zip › elife_poa_e62373_Table_1_source_data_1.xlsx]

## Sheet: Sheet1
Table 1
Membrane, firing and morphological properties of PV+INTs
WT_FS	WT_NFS	GlobalLis_FS	GlobalLis_IS	GlobalLis_NFS	NkxLis_FS	NkxLis_IS	NkxLis_NFS	EmxLis_FS	EmxLis_NFS		WT_FS	WT_NFS	GlobalLis_FS	GlobalLis_IS	GlobalLis_NFS	NkxLis_FS	NkxLis_IS	NkxLis_NFS	EmxLis_FS	EmxLis_NFS		WT_FS	WT_NFS	GlobalLis_FS	GlobalLis_IS	GlobalLis_NFS	NkxLis_FS	NkxLis_IS	NkxLis_NFS	EmxLis_FS	EmxLis_NFS		WT_FS	WT_NFS	GlobalLis_FS	GlobalLis_IS	GlobalLis_NFS	NkxLis_FS	NkxLis_IS	NkxLis_NFS	EmxLis_FS	EmxLis_NFS		WT_FS	WT_NFS	GlobalLis_FS	GlobalLis_IS	GlobalLis_NFS	NkxLis_FS
Input res	Input res	Input res	Input res	Input res	Input res	Input res	Input res	Input res	Input res		Rheobase	Rheobase	Rheobase	Rheobase	Rheobase	Rheobase	Rheobase	Rheobase	Rheobase	Rheobase		Freq 2x	Freq 2x	Freq 2x	Freq 2x	Freq 2x	Freq 2x	Freq 2x	Freq 2x	Freq 2x	Freq 2x		Freq 3x	Freq 2x	Freq 2x	Freq 2x	Freq 2x	Freq 2x	Freq 2x	Freq 2x	Freq 2x	Freq 2x		Adapt 2x	Adapt 2x	Adapt 2x	Adapt 2x	Adapt 2x	Adapt 2x
74.97	95.17	79.3744	107.52	97.22	45.2522	84.2163	217.333	138.132	128.958		300	150	300	300	200	850	300	100	250	200		140	94	150	108	54	294	90	50	126	66		188	136	212	150	54	294	132	76	160	98		0.79	0.63	0.786473	0.621539	0.756677	0.71788
83.38	109.7	88.36	130.819	164	96.5584	92.8812	177.904	53.6721	176.62		300	100	400	300	150	400	300	150	500	100		144	52	236	112	28	202	90	64	168	46		194	80	260	112	44	258	136	84	304	46		0.88	0.67	0.763367	0.622251	0.864116	0.671872
102.53	96.99	81.63	78.7	125.53	42.7458	60.1234	228.917	79.8503	188.447		300	150	450	300	200	600	350	100	450	150		108	94	174	98	84	178	132	80	120	70		124	132	184	100	106	198	162	122	168	100		0.73	0.72	0.863161	0.636027	0.671627	0.778218
81.56	93.26	95.55	84.56	141.416	56.6793	111.616	239.095	49.113	171.24		400	200	300	350	100	550	250	100	650	150		194	68	134	86	62	100	102	78	186	42		222	88	160	120	94	130	138	96	186	56		0.94	0.7	0.854242	0.620261	0.875107	0.901523
48.54	226.86	44.3672	64.1		68.0574	81.9015	166.498	63.5404	173.93		700	100	550	350		500	400	100	500	150		164	54	134	48		182	90	74	126	64		176	86	134	70		182	136	94	126	80		0.75	0.82	0.65655	0.637765		0.614407
135.14	114.67	54.78	90.4658		102.257	55.2531	280.242	127.441	190.04		150	250	400	250		400	350	100	300	100		118	70	116	102		152	90	90	116	62		162	78	138	142		180	126	118	172	90		0.92	0.85	0.752621	0.830228		0.713701
119.79	157.98	52.31	105.5		42.3577	101.473	146.082	102.136	209.42		300	100	500	200		600	250	200	450	150		152	26	160	142		180	80	78	192	54		162	96	260	176		230	84	112	212	68		0.85	0.4	0.814816	0.907968		0.67754
134.54	97.98	85.0397	61.6336		76.7659	48.9808	149.62	68.5678	146.791		250	150	400	450		400	400	150	500	150		128	80	302	128		128	110	64	156	60		148	112	336	128		156	132	104	224	84		0.89	0.48	0.965548	0.531935		0.664302
72.4	146.57	55.07	64.8604		61.9774	103.028		82.8435			450	200	500	500		300	300		400			132	62	214	92		172	112		206			132	80	246	146		238	160		250			0.61	0.66	0.956174	0.620175		0.671382
65.88	209.8	59.46	92.3971		30.3657	94.1026		62.76			400	100	500	250		650	300		650			130	74	186	100		222	102		140			148	110	208	122		248	146		140			0.82	0.82	0.771729	0.855678		0.750795
100.7	154.54	75.01	72.6462		51.4392	73.5802		102.39			250	100	300	450		600	350		300			92	56	152	90		126	92		162			132	84	284	92		160	136		162			0.75	0.71	1.05979	0.640365		0.979805
53.78	161.34	62.3195	73.3559		59.2524	95.8804		69			450	150	450	450		550	250		350			172	84	136	100		142	80		130			192	96	164	110		282	118		130			0.97	0.69	0.85619	0.57807		0.474783
51.26	164.8	81.3421	87.2361			69.5542		74.62			350	100	450	400			450		450			124	46	122	116			104		160			168	100	168	162			156		160			0.89	0.84	0.594193	0.653583
94.88	233.64	46.7847	57.955			53.1768		34.45			250	100	500	500			500		800			96	60	150	116			108		196			128	84	250	154			172		196			0.82	0.66	0.689318	0.841725
93.15	102.03	58.216	82.7348			72.4992		97.3541			250	250	550	400			450		200			132	58	148	140			104		102			186	74	206	146			126		146			0.97	0.52	0.750448	0.863967
71.45	124.12	40.4948	108.526			143.931		55.19			500	250	450	250			250		650			112	78	150	126			116		134			166	102	228	158			132		146			0.85	0.6	0.934072	0.857695
50.67		86.4603	84.4066			46.1848		54.06			400		350	350			400		500			176		126	110			74		154			186		180	112			92		238			0.86		0.816943	0.738279
79.86		34.649	86.0811			57.4017		67.41			300		550	300			550		450			126		116	78			76		154			192		216	106			92		200			1.06		0.453682	0.632724
189.27		38.42	76.7994			74.932		57.97			200		650	300			400		500			114		224	96			104		150			154		246	118			148		266			1.02		0.740337	0.58312
82.02		50.4	99.8393			97.2395		58.06			400		600	300			200		600			170		240	110			64		194			198		250	138			110		234			0.75		0.996086	0.829054
117.71			147.85			177.114		69.53			150			200			200		450			112			132			88		232			148			172			120		314			0.94			0.878311
121.85								105.36			250								400			106								158			106								182			0.72
100.45								51.54			250								500			112								118			162								190			0.76
72.78								113.31			350								200			152								104			190								142			0.87
73.68								104.36			300								500			124								140			154								140			0.9
89.16								53.96			350								500			136								276			184								320			0.7
133.9								39.18			200								600			94								132			112								168			0.74
86.87								65.08			350								500			130								200			154								266			0.66
113.47								65.97			200								400			90								114			106								202			0.57
104.5								82.58			300								400			88								116			120								126			0.71
99.06											300											118											166											0.85
98.6											200											80											108											0.69
60.23											350											158											174											0.79
97.11											300											124											134											0.69
49.81											550											176											196											0.87
76.89											300											212											264											0.75
58.17											500											278											314											0.86
78.7											450											228											278											0.82
73.33											550											240											272											0.72
87.54											250											118											168											0.73
51.24											450											184											216											0.97
37.97											550											138											162											0.86
57.43											450											122											160											0.38
68.4											450											118											194											0.68
37.63											550											126											144											0.71
67.87											450											136											136											0.64
31.98											1000											146											230											0.66
66.32											450											148											160											0.74
92.21											300											94											156											0.71
98.98											250											150											184											0.87
122.18											300											168											192											0.8
91.05											300											148											182											0.81
127.96											250											98											130											0.75
68											400											126											144											0.75
83.46											200											110											150											0.62
46.38											350											204											204											0.83
26.66											600											132											216											1.06
35.32											500											184											184											0.98
63.63											450											134											142											0.99
87.63											300											116											148											0.8
82.27											450											132											234											0.62
72.43											450											174											188											0.69
56.87											450											134											164											0.87
108.23											200											108											150											0.83
50.27											450											106											126											0.52
92.71											300											112											178											0.72
120.816											200											72											106											0.89
[truncated: 124 more columns]
