# Supplementary material for: Emergence of non-canonical parvalbumin-containing interneurons in hippocampus of a murine model of type I lissencephaly
Source: eLife journal article supplement (doi:10.7554/elife.62373), 2020-11-05
Supplement: supp [file elife-62373-supp-v1.zip › elife_poa_e62373_Table_2_source_data_1.xlsx]

## Sheet: Sheet1
Table 2
Post natal days at age of recording
WT_FS	WT_NFS	GlobalLis_FS	GlobalLis_IS	GlobalLis_IS
PND	PND	PND	PND	PND
24	25	26	28	27
24	40	26	33	27
49	48	30	24	36
28	25		28	36
40	28		28	20
40	25		32	22
41	19		32	23
41			32
31			32
			32
Other soruce data for table 2 is listed in source data for Figure 5
