# Supplementary figures and images for: Emergence of non-canonical parvalbumin-containing interneurons in hippocampus of a murine model of type I lissencephaly
Source: eLife journal article supplement (doi:10.7554/elife.62373), 2020-11-05

FIGURE 7–Supplement 1

A

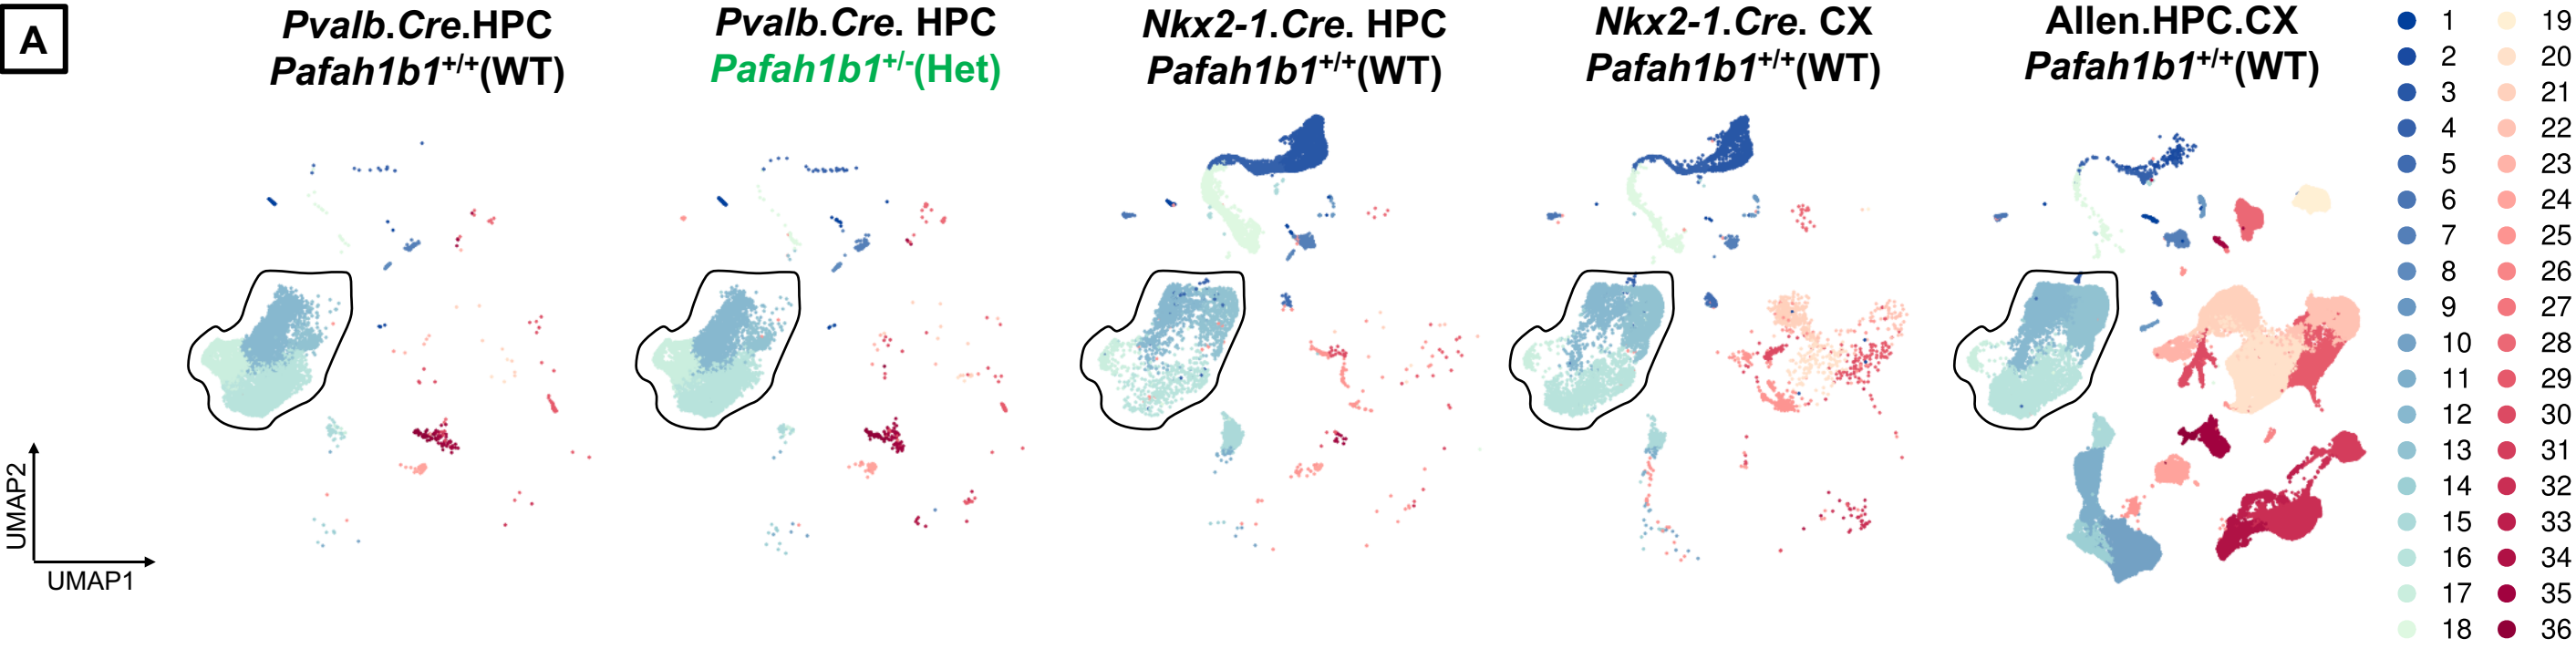

B

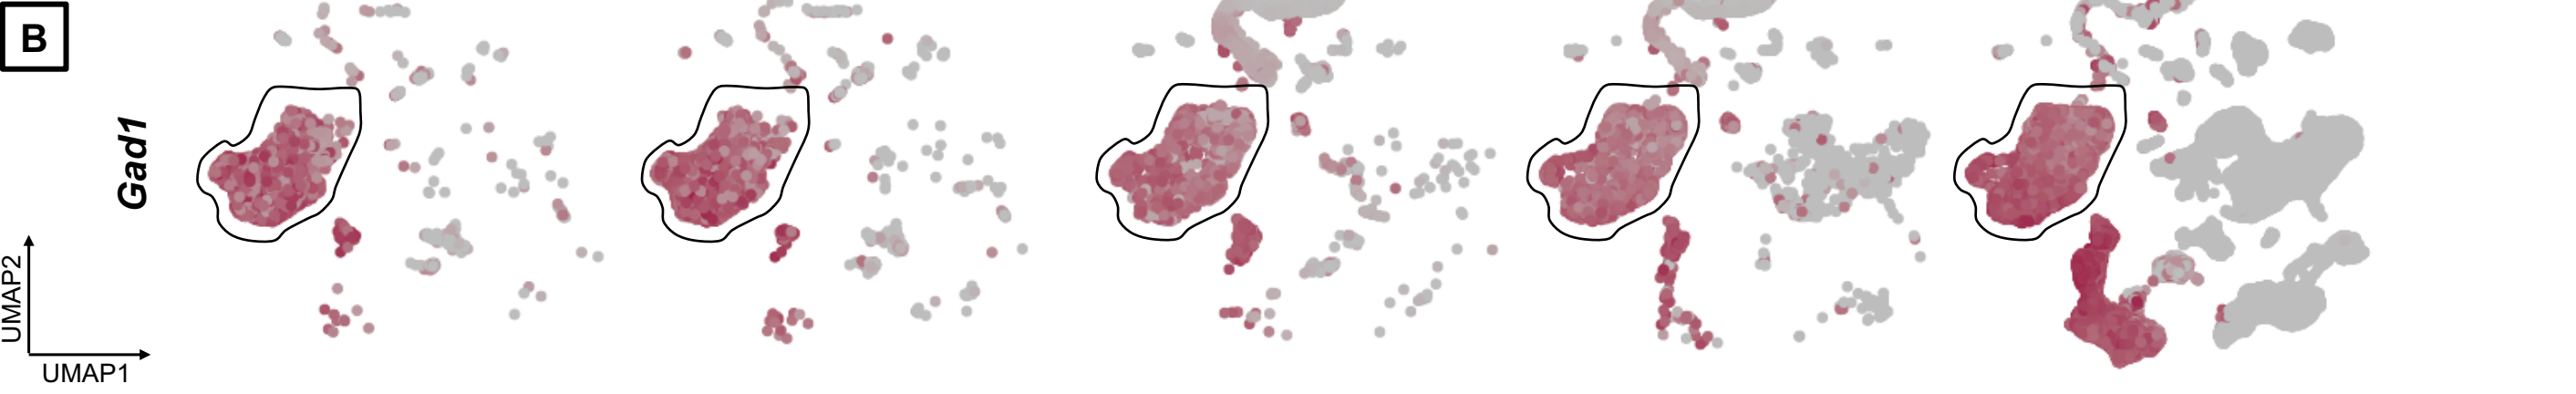

C

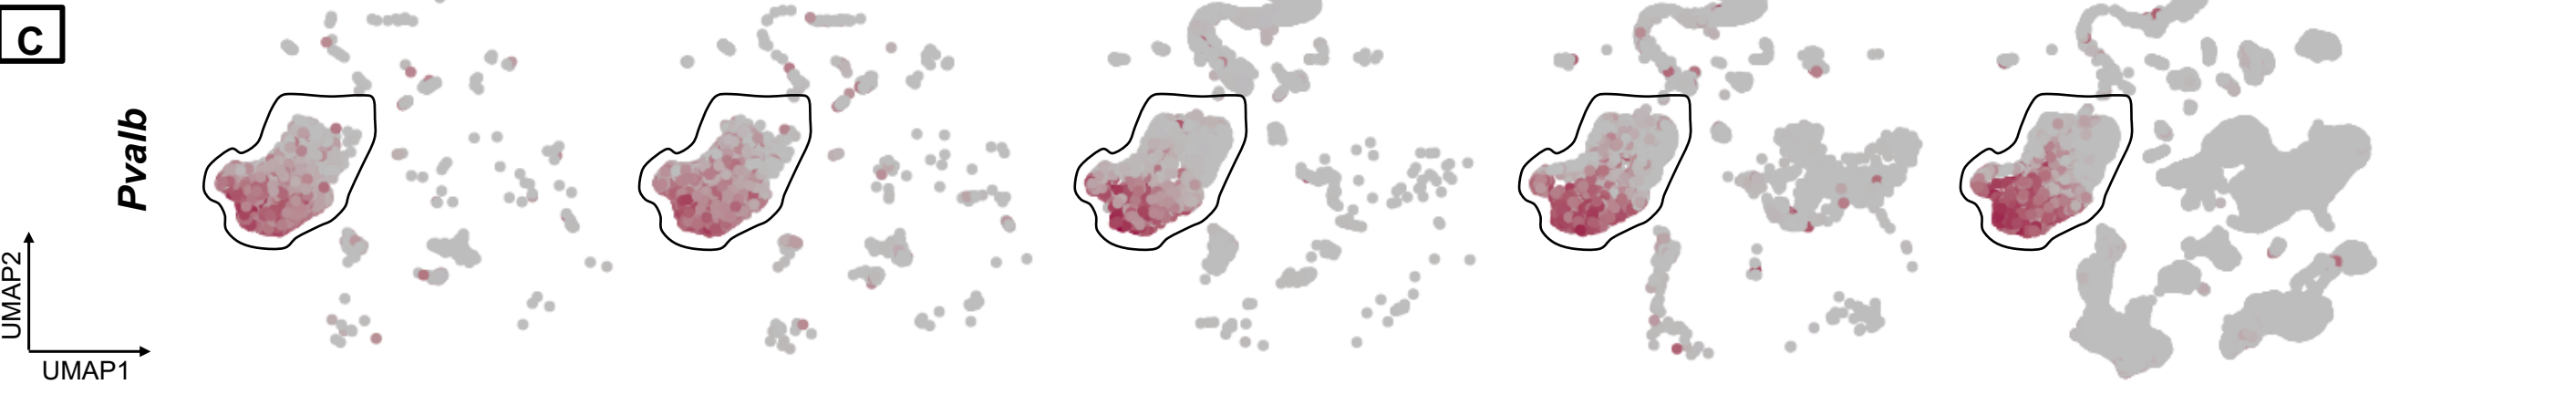

Supplement: supp [file elife-62373-supp-v1.zip]

**Figure 2 -- Supplement 1**

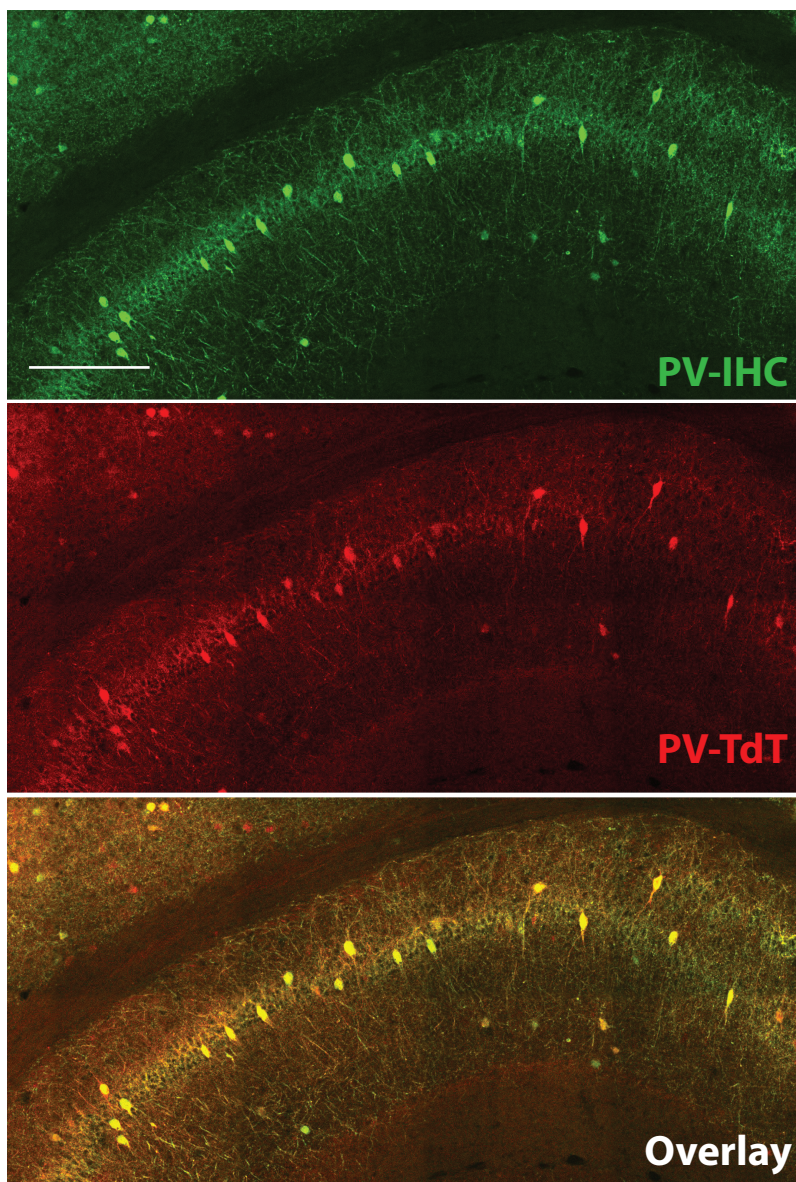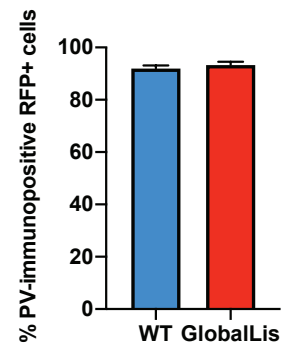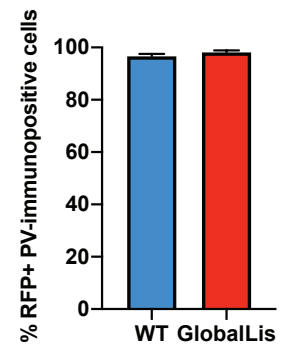

Supplement: supp [file elife-62373-supp-v1.zip › elife_poa_e62373_Figure_2_figure_supplement_1.pdf]

### Figure 3--Supplement 1

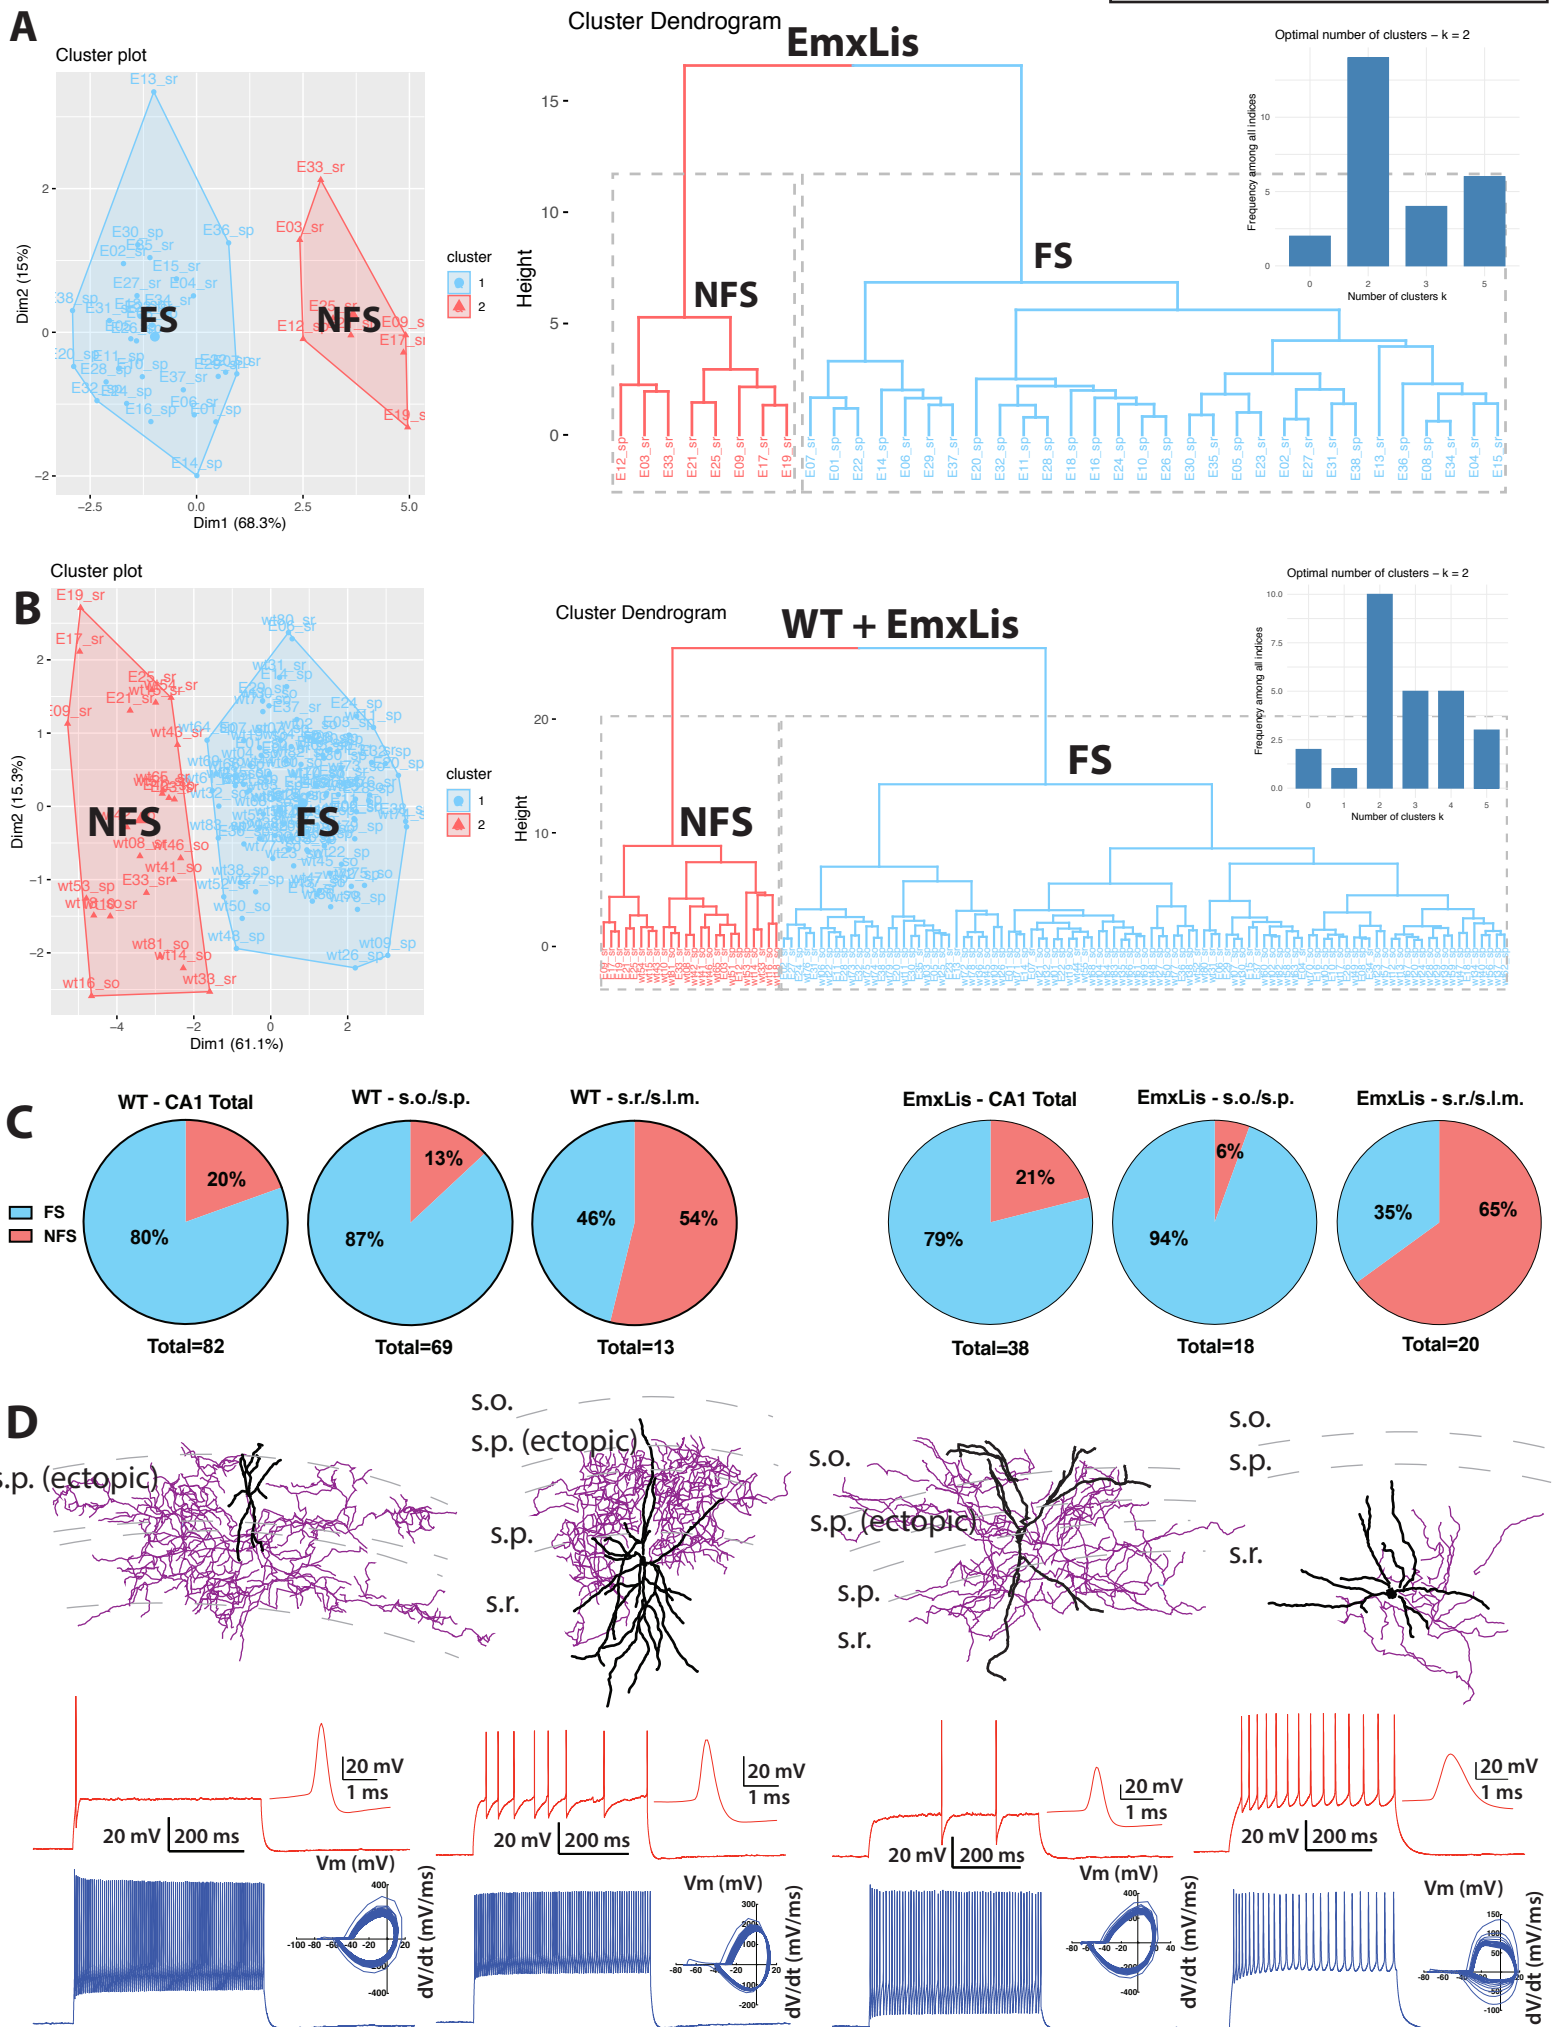

Supplement: supp [file elife-62373-supp-v1.zip › elife_poa_e62373_Figure_3_figure_supplement_1.pdf]

**A**

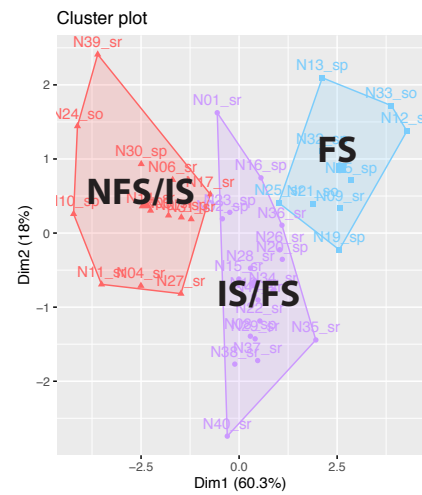

Cluster Dendrogram

**NkxLis**

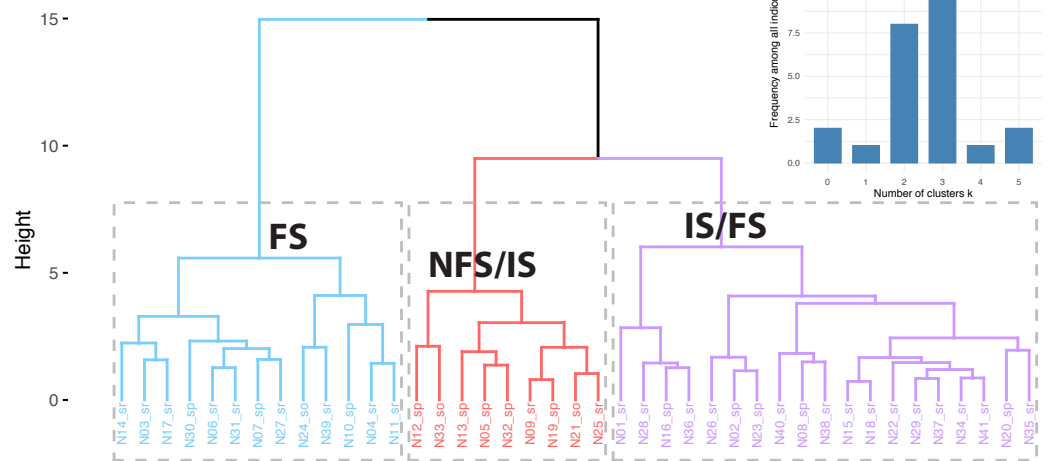

**B**

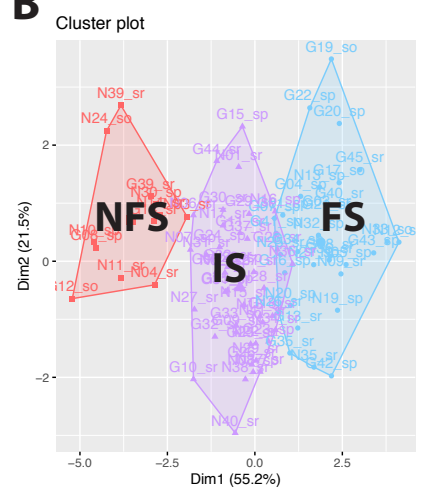

Cluster Dendrogram

**GlobalLis + NkxLis**

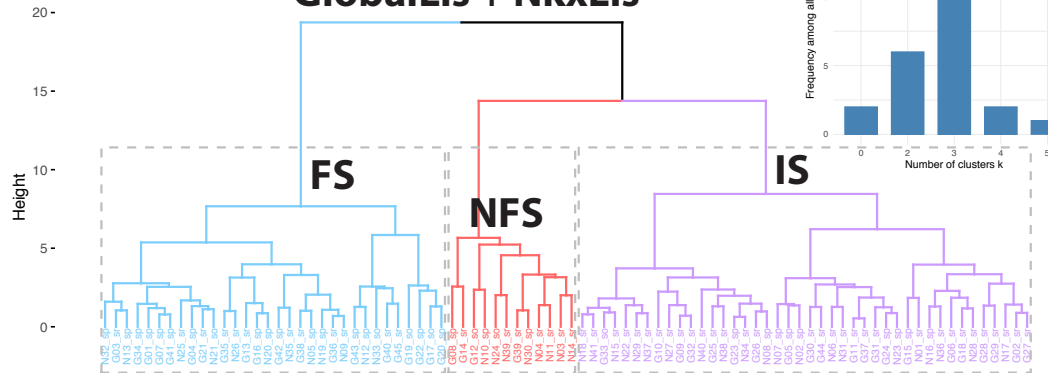

**C**

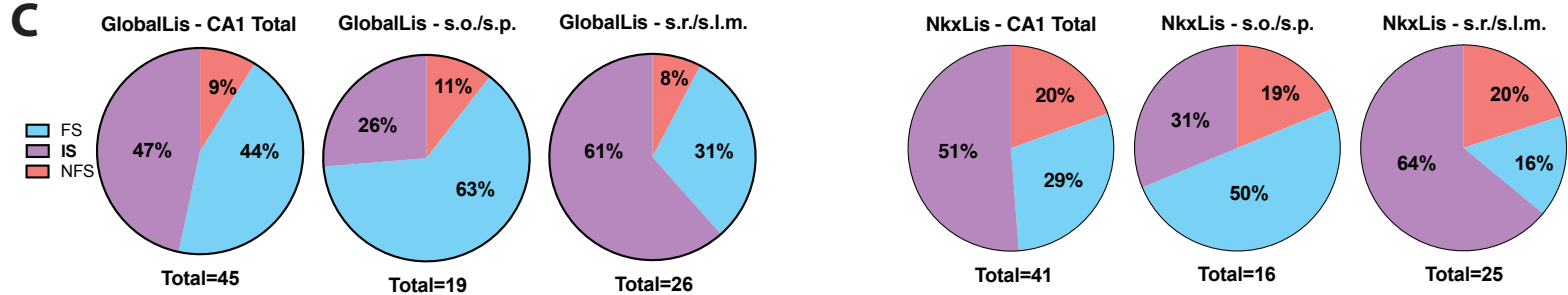

**D**

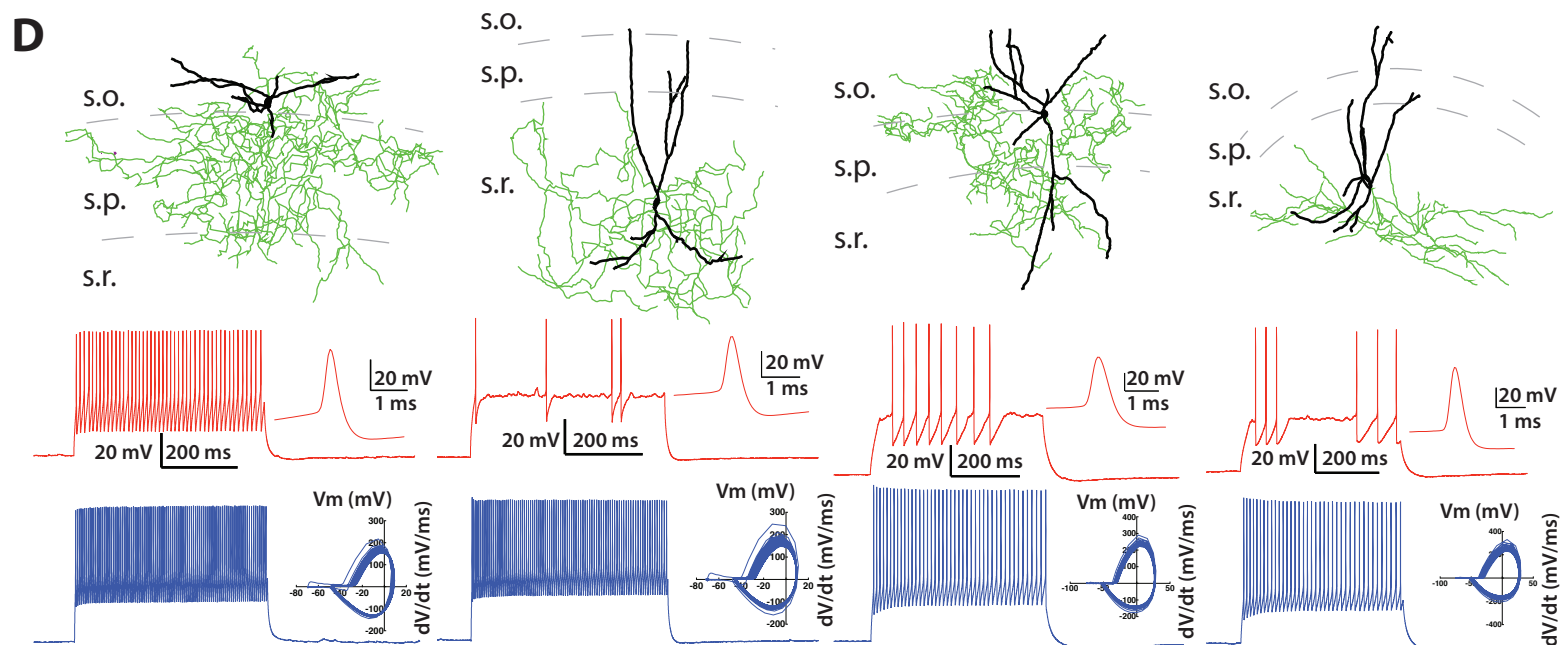

Supplement: supp [file elife-62373-supp-v1.zip › elife_poa_e62373_Figure_4_figure_supplement_1.pdf]

Figure 4-- Supplement 2

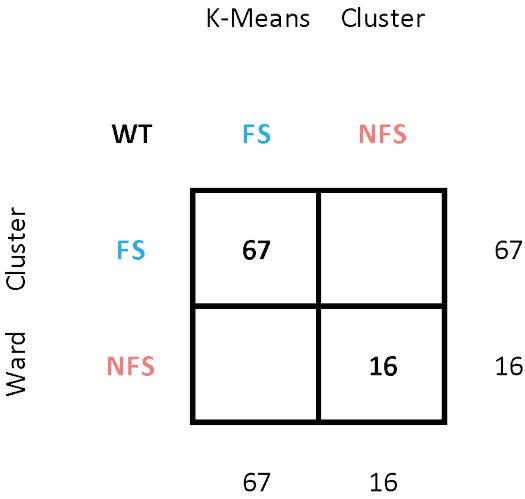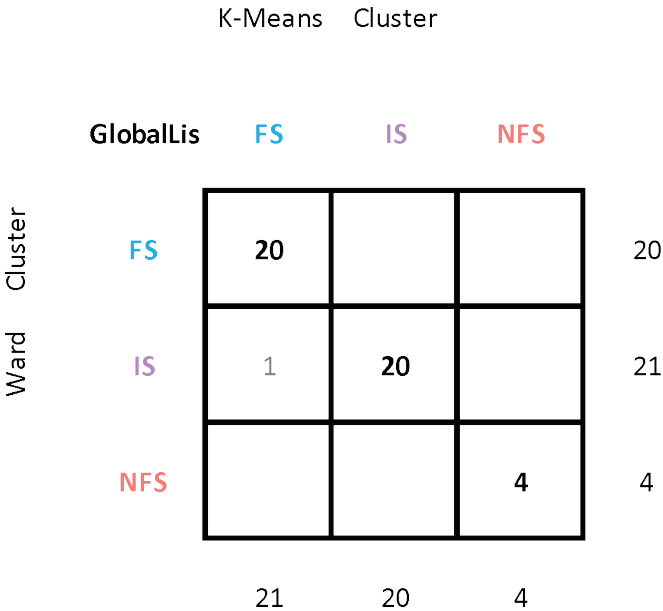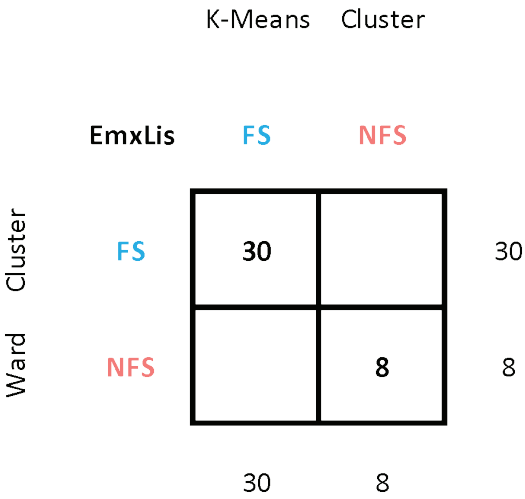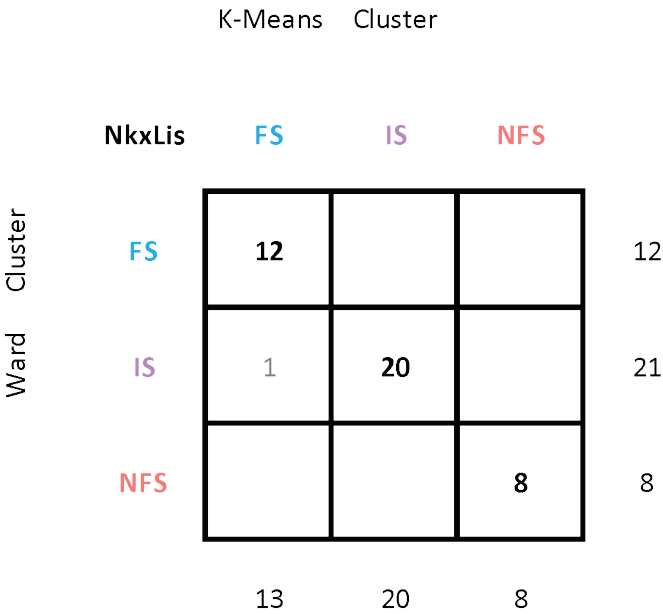

Supplement: supp [file elife-62373-supp-v1.zip › elife_poa_e62373_Figure_4_figure_supplement_2.pdf]

**A**

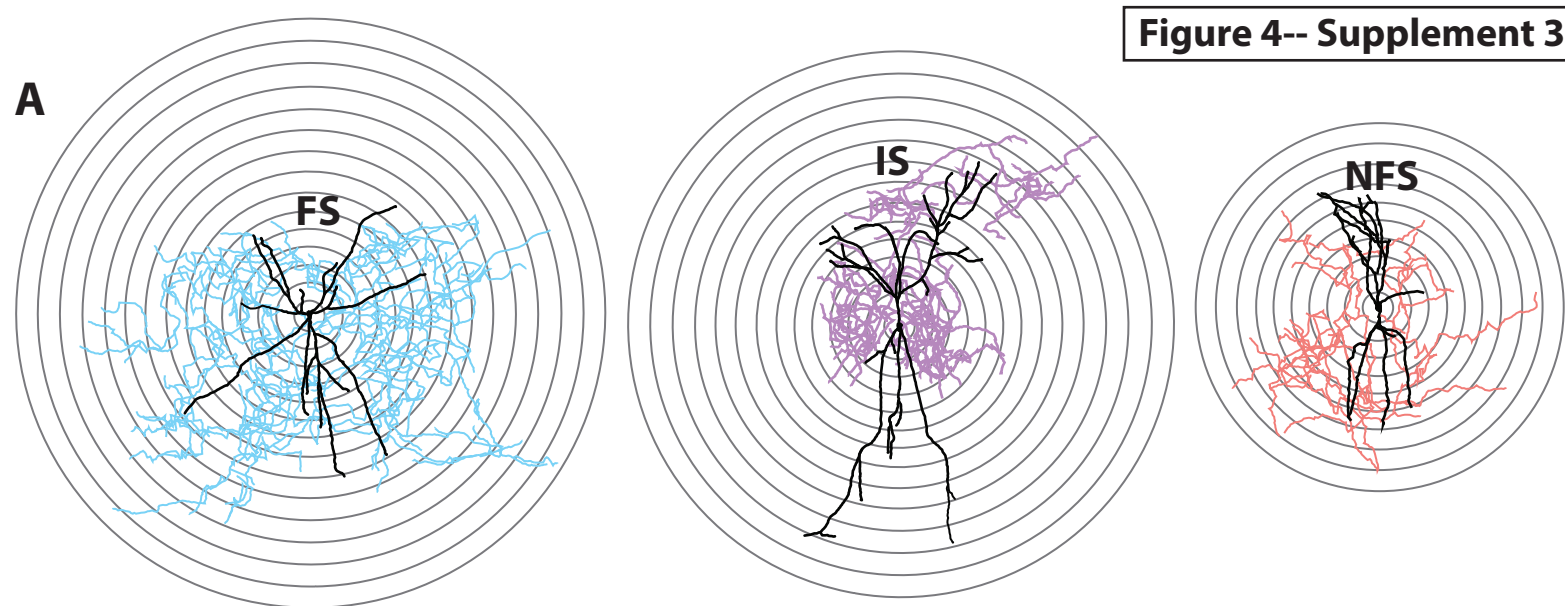

**B**

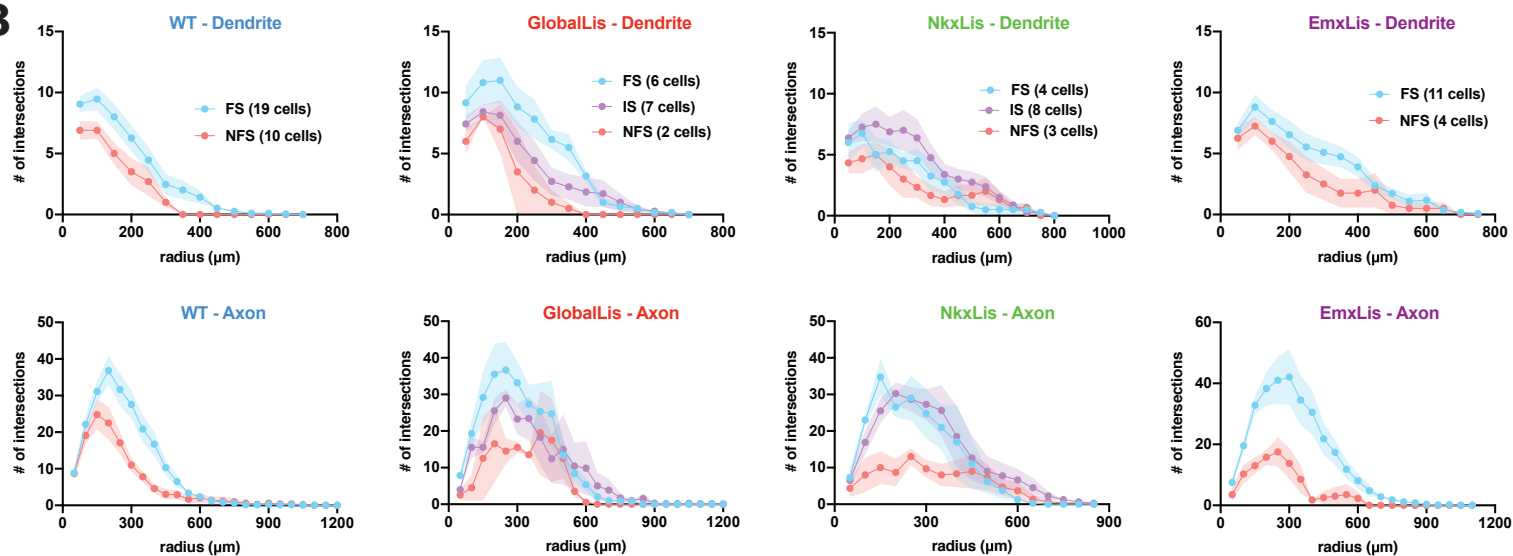

**C**

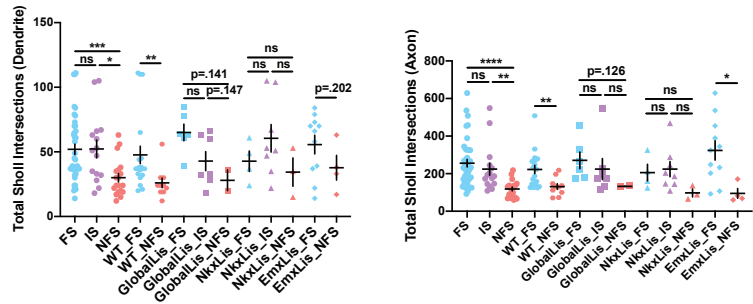

Supplement: supp [file elife-62373-supp-v1.zip › elife_poa_e62373_Figure_4_figure_supplement_3.pdf]

**Figure 4 -- Supplement 4**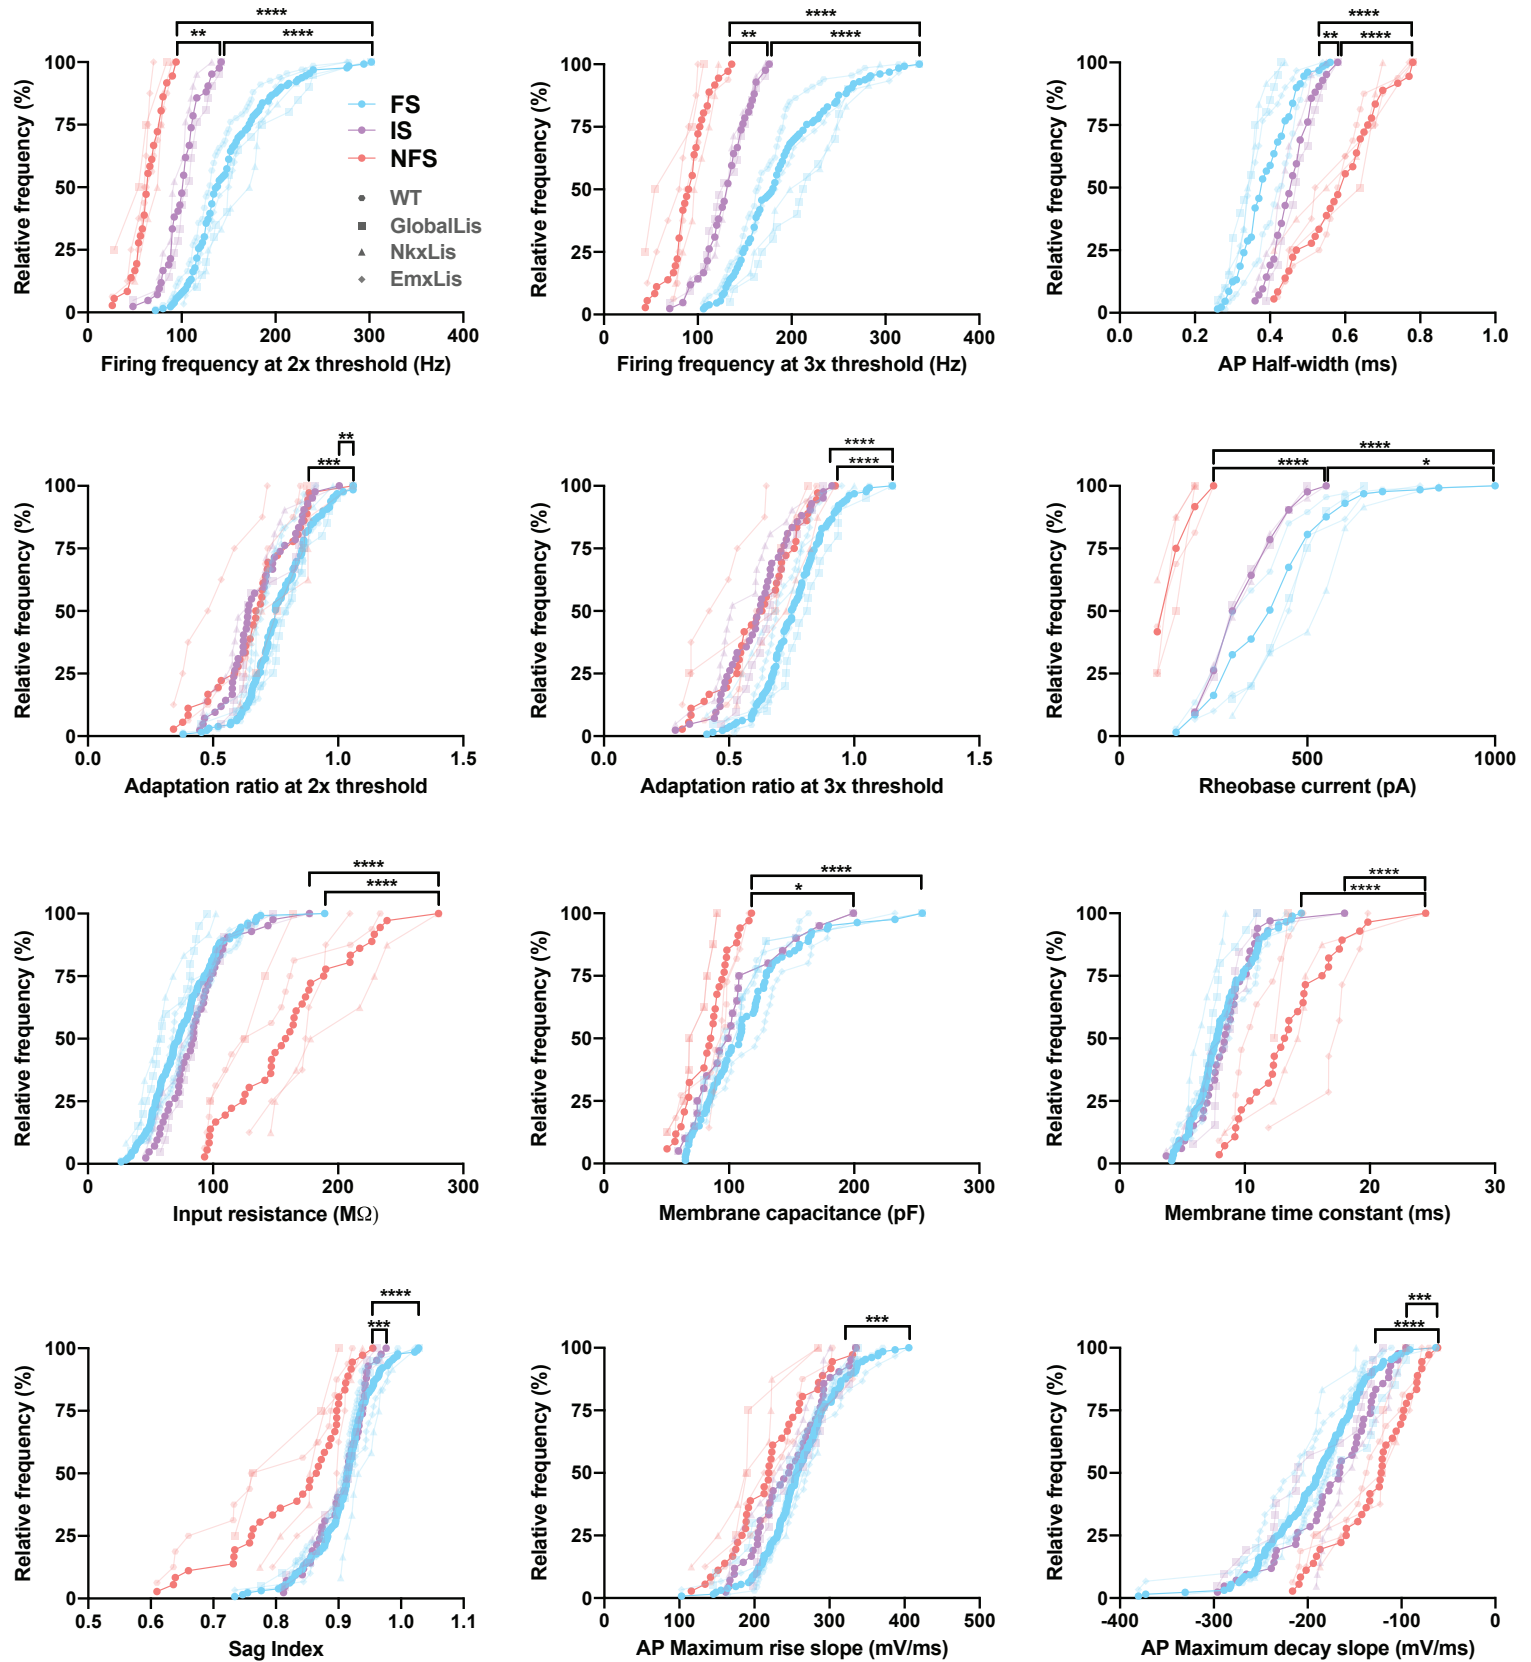

Supplement: supp [file elife-62373-supp-v1.zip › elife_poa_e62373_Figure_4_figure_supplement_4.pdf]

**Figure 5--Supplement 1**

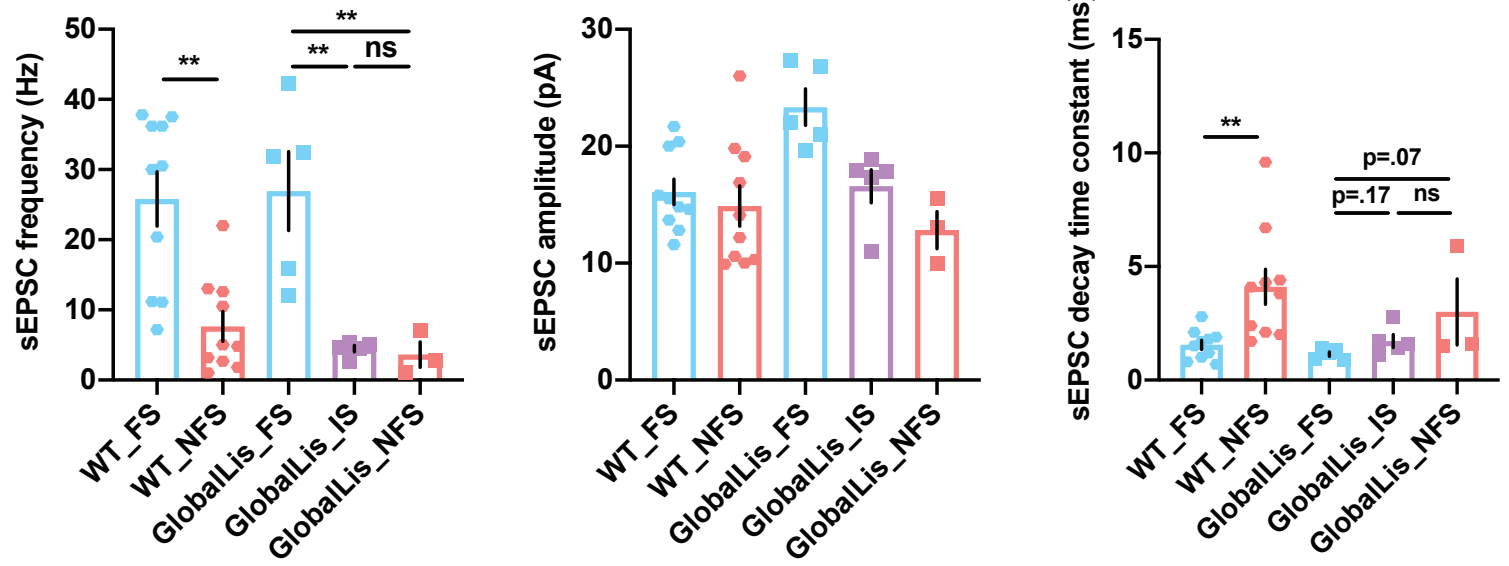

Supplement: supp [file elife-62373-supp-v1.zip › elife_poa_e62373_Figure_5_figure_supplement_1.pdf]

FIGURE 7—Supplement 2

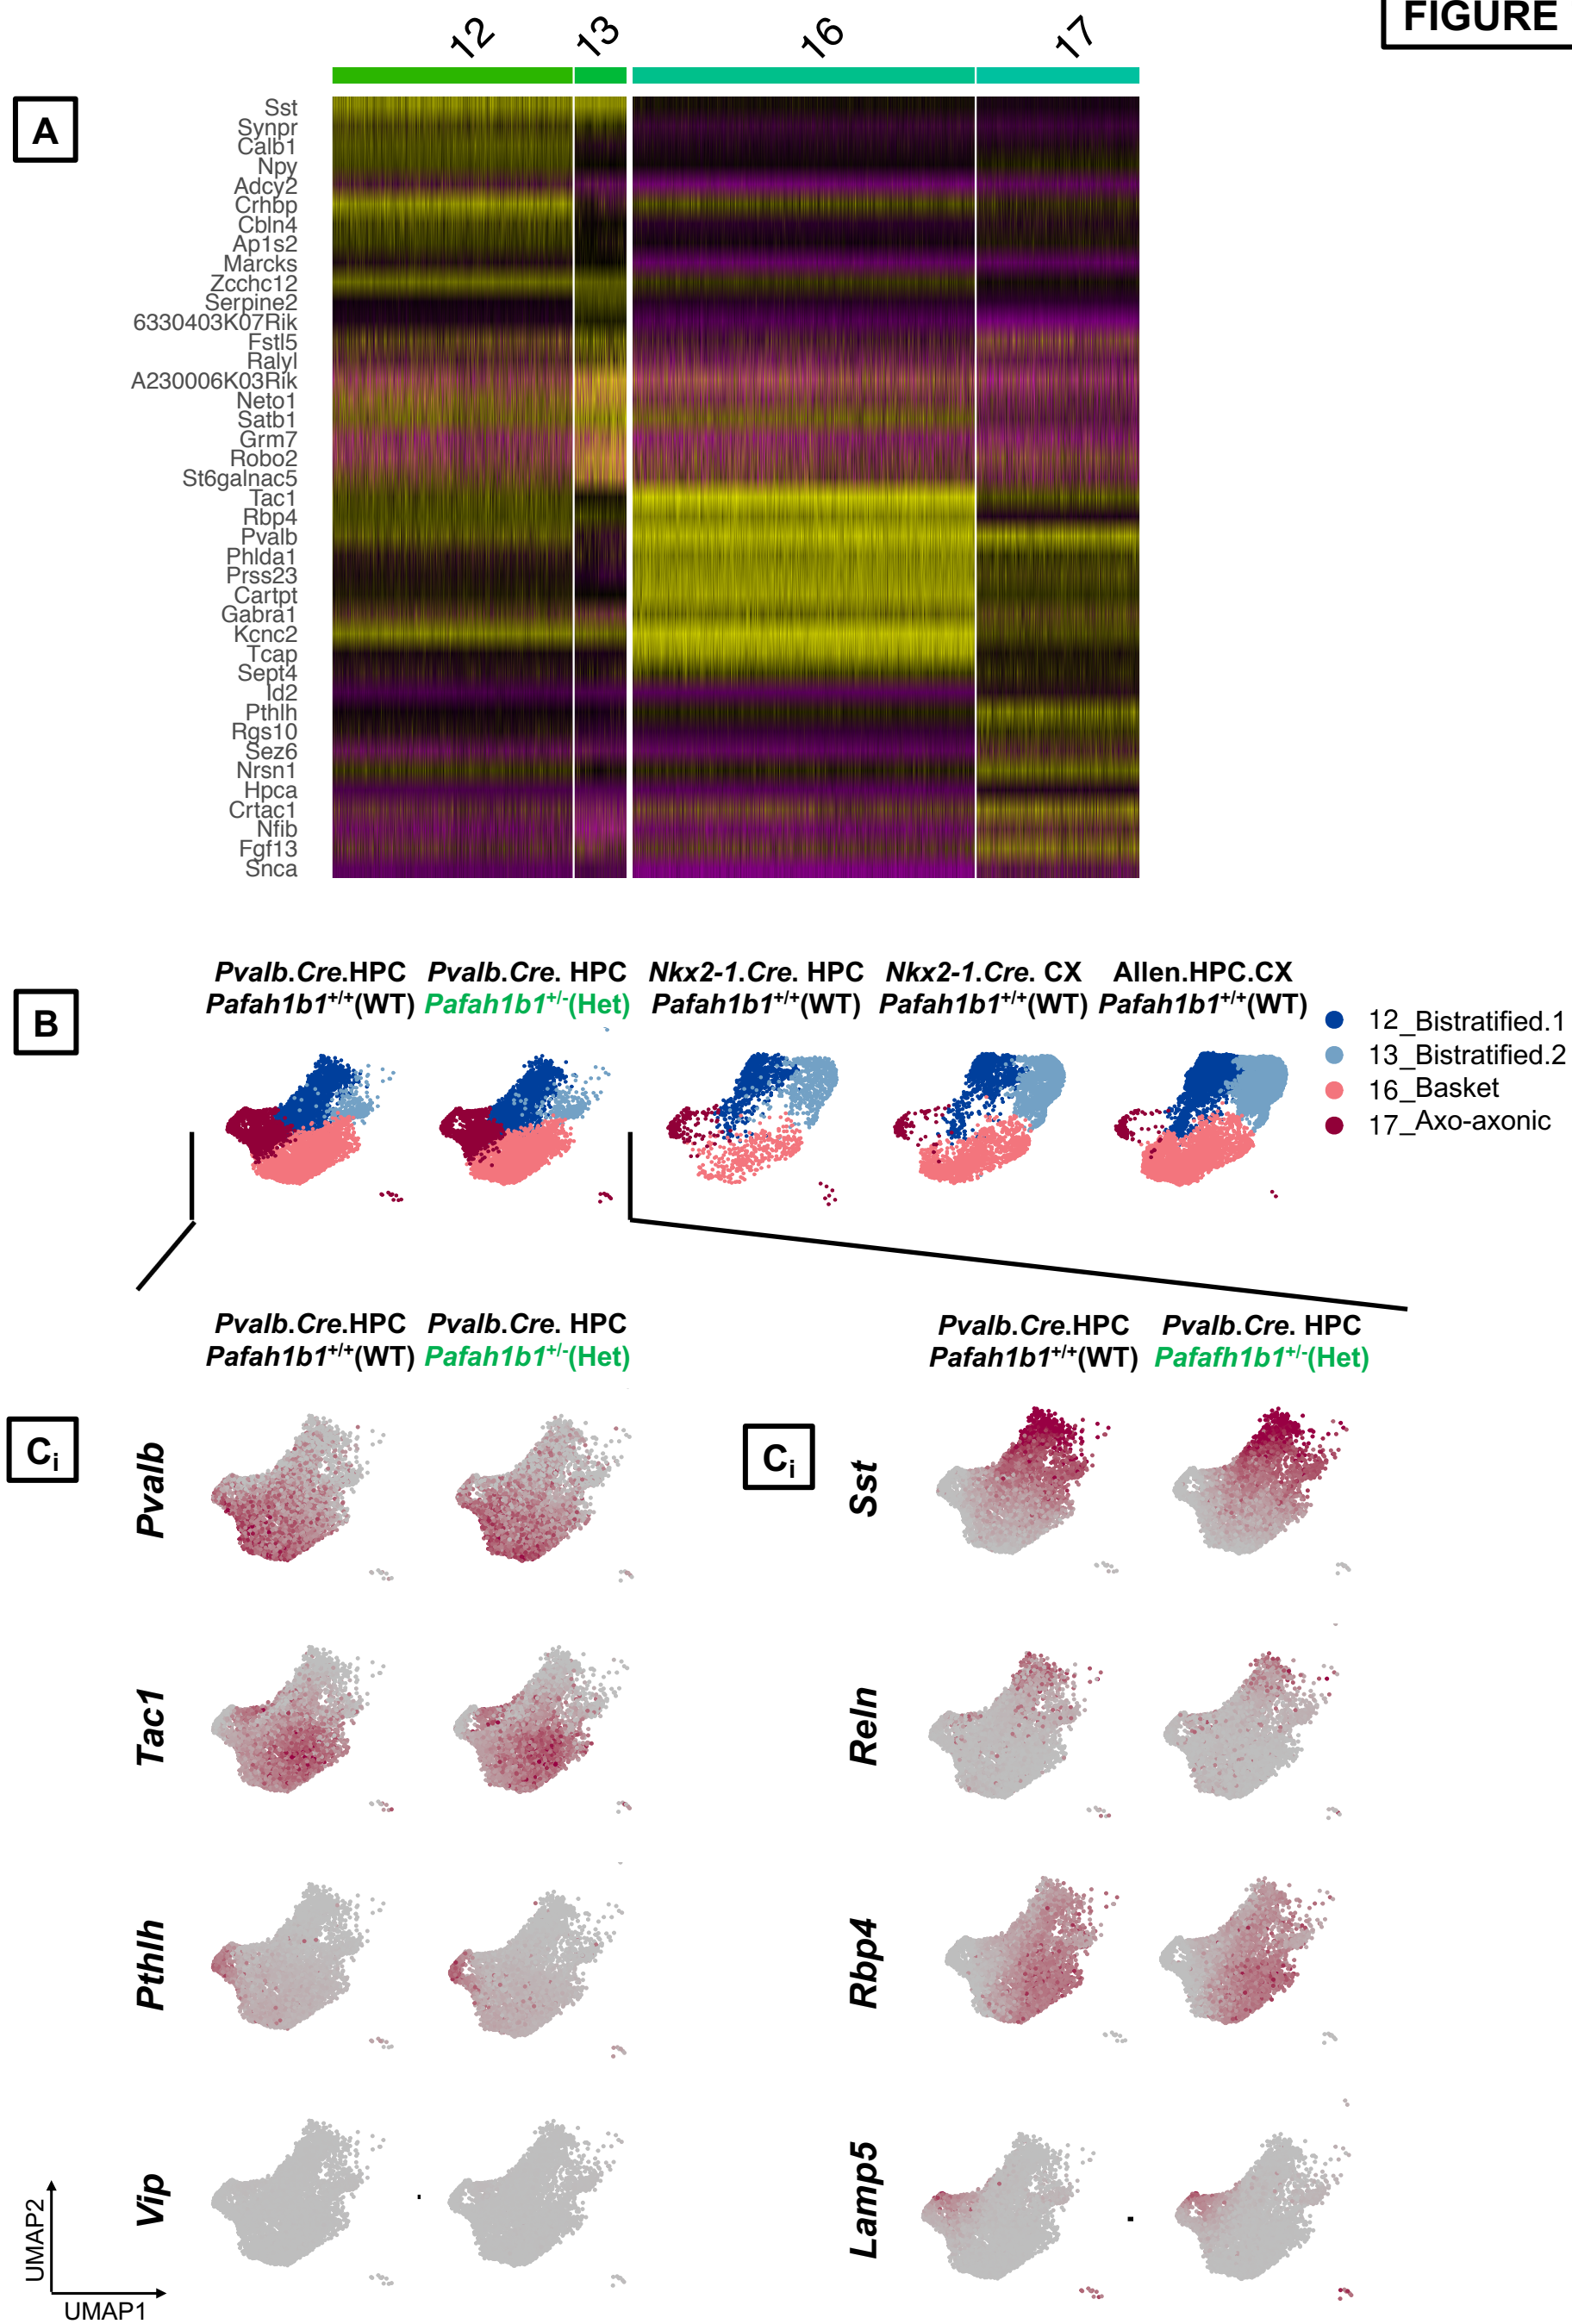

Supplement: supp [file elife-62373-supp-v1.zip › elife_poa_e62373_Figure_7_figure_supplement_2.pdf]
